1 **PHR1 and PHL1 mediate rapid high-light responses and**  
2 **acclimation to triose phosphate oversupply**

3

4 Lukas Ackermann<sup>1</sup>, Monika Müller<sup>1</sup>, Alina Johanna Hieber<sup>1</sup>, Maria Klecker<sup>1\*</sup>

5

6 <sup>1</sup> Plant Physiology, University of Bayreuth, 95440 Bayreuth, Germany

7 \*Address correspondence to: Maria Klecker, Department of Plant Physiology, University of  
8 Bayreuth, Universitätsstrasse 30, D-95447 Bayreuth, Germany. e-mail: maria.klecker@uni-  
9 bayreuth.de

10

11 **Short title:** PHR1 and PHL1 signal photosynthetic stress

12

13 ORCID IDs

14 Maria Klecker 0000-0001-5508-2363

15 Lukas Ackermann 0009-0009-8604-6029

## 16 ABSTRACT

17 Fluctuations in light intensity require immediate metabolic adjustment which includes  
18 reprogramming of both plastidial and nuclear gene expression, but the signaling pathways  
19 behind such responses are not fully understood. Here we report the identification of an early  
20 high-light responsive pathway in *Arabidopsis thaliana* that depends on PHOSPHATE  
21 STARVATION RESPONSE 1 (PHR1) and PHR1-LIKE 1 (PHL1) transcription factors  
22 involved in low phosphate ( $P_i$ ) signaling. High-light treatment rapidly induced the accumulation  
23 of PHR1-responsive transcripts in wildtype plants grown under nutrient-sufficient conditions,  
24 but not in *phr1 phl1* double knockout plants. Differences in starch accumulation and ATP levels  
25 were detected between wildtype and *phr1 phl1* mutants subjected to high light, suggesting a  
26 link between  $P_i$  signaling, carbohydrate partitioning, and energy status during stress. In line  
27 with a function of PHR1/PHL1 upon triose phosphate accumulation, we observed that blocking  
28 starch biosynthesis in the *phr1 phl1* double mutant, by introducing the *agd1-1* allele, causes a  
29 severe growth defect. Phenotypes of the *agd1 phr1 phl1* triple mutant such as high-light  
30 sensitivity and growth restriction in the absence of exogenously supplied sucrose resemble the  
31 previously described double mutant *agd1 tpt-2*, lacking a functional copy of the TRIOSE  
32 PHOSPHATE/PHOSPHATE TRANSLOCATOR (TPT), and we show that  $P_i$  responses are  
33 disturbed in *agd1 tpt-2*. We propose that  $P_i$  sequestration by photosynthesis and import of  $P_i$   
34 into the chloroplast transiently depletes cytosolic  $P_i$  reserves upon sudden increases in light  
35 intensity. The low- $P_i$  sensing machinery in the nucleus consequently implements early high-  
36 light transcriptional responses, qualifying  $P_i$  as a new operational retrograde signal.

37

## 38 Introduction

39 Light as a source of energy with highly fluctuating availability needs to be efficiently  
40 captured by the photoautotrophic metabolism. This necessitates an enzymatic machinery  
41 capable of coping with rapid changes in metabolic flux, as well as the containment of  
42 overexcitation-induced hazards. Both challenges are met not only by post-transcriptional  
43 regulation of enzyme activity (reviewed in König et al. (2012), Matioli et al. (2022)), but also  
44 by pronounced changes in mRNA abundance that occur within 30 minutes upon an increase in  
45 irradiance (Vogel et al., 2014; Suzuki et al., 2015; Huang et al., 2019). The latter mechanism  
46 depends on fast signal transmission between the chloroplast and the nuclear transcription  
47 machinery. Such communication is mediated by ‘primary’ retrograde signals (Dietz, 2015),

48 including redox cues and reactive oxygen species like H<sub>2</sub>O<sub>2</sub> and singlet oxygen which are  
49 produced during photosynthetic reactions (Bechtold et al., 2008; Dietz et al., 2016).  
50 Additionally, increased electron transport activity and light-induced Calvin cycle activation  
51 promote the accumulation of primary products of carbon fixation (Dietz and Heber, 1984; Dietz  
52 and Heber, 1986) which may themselves act as signaling molecules (Häusler et al., 2014; Moore  
53 et al., 2014). Hence, induction of high-light specific gene expression partially depends on the  
54 triose phosphate/phosphate translocator (TPT) that mediates the exchange of triose phosphates  
55 or 3-phosphoglycerate (3-PGA) with inorganic phosphate (P<sub>i</sub>) at the chloroplast envelope  
56 (Schneider et al., 2002; Vogel et al., 2014; Weise et al., 2019). A central function of the TPT in  
57 light acclimation and retrograde signaling was corroborated by the severe high-light dependent  
58 phenotypes of double mutants defective in the *TPT* and *ADG1* (for *ADP GLUCOSE*  
59 *PYROPHOSPHORYLASE 1*), encoding a small subunit of the ADP-glucose pyrophosphorylase  
60 complex (AGPase) which is required for the biosynthesis of transitory starch (Schmitz et al.,  
61 2012). Phenotypes of *adg1-1 tpt* double mutants include growth retardation, low diurnal  
62 changes in carbohydrate levels, and high chlorophyll fluorescence. These observations point  
63 towards an important role of photosynthate partitioning for retrograde signaling, however the  
64 identity of the primary sensors as well as signal transduction mechanisms are still unclear.

65 Phosphorus makes up about 2-30 permille of the plant dry mass (Kumar et al., 2019), as it is  
66 incorporated into a large subset of biomolecules. Systemic signaling of P<sub>i</sub> availability and P<sub>i</sub>  
67 distribution within the plant body mainly depend on a conserved gene family encoding  
68 PHOSPHATE STARVATION RESPONSE 1 (PHR1) and PHR1 LIKE (PHL) transcription  
69 factors of the MYB coiled-coiled type (Rubio et al., 2001; Zhou et al., 2008; Bustos et al., 2010;  
70 Thibaud et al., 2010; Sun et al., 2016). Simultaneous loss of *PHR1* and *PHL1* function affects  
71 the expression of at least 68 percent of the P<sub>i</sub> starvation responsive genes in the shoots of  
72 *Arabidopsis* (*Arabidopsis thaliana*) (Bustos et al., 2010). A decrease in cellular P<sub>i</sub> concentration  
73 impairs production of the inositol pyrophosphate species InsP<sub>8</sub>, relieving PHR1/PHLs of  
74 suppression by SPX (for SYG1/Pho81/XPR1) domain-containing proteins, thus linking  
75 transcription factor activity to P<sub>i</sub> availability (Puga et al., 2014; Dong et al., 2019; Zhu et al.,  
76 2019; Ried et al., 2021). The transcriptional response to P<sub>i</sub> scarcity leads to scavenging of  
77 external and internal P<sub>i</sub> sources through phosphatase induction (Morcuende et al., 2007) and  
78 altered lipid metabolism (Misson et al., 2005; Pant et al., 2015b), anthocyanin biosynthesis  
79 (Nilsson et al., 2012; Liu et al., 2022; Li et al., 2023), and protection from photodamage  
80 (Nilsson et al., 2012), to name a selection. PHR1/PHLs are characterized as transcriptional  
81 activators (Nilsson et al., 2007; Bustos et al., 2010). Accordingly, direct targets of PHR1

82 (Bustos et al., 2010; Castrillo et al., 2017) are strongly upregulated upon  $P_i$  starvation and  
83 include genes such as *PHOSPHATE STARVATION-INDUCED GENE 2* (*PS2*; AT1G73010)  
84 (Hanchi et al., 2018), *MONOGALACTOSYLDIACYLGLYCEROL SYNTHASE 3* (*MGD3*;  
85 AT2G11810) (Kobayashi et al., 2004), and *GLYCEROPHOSPHODIESTER*  
86 *PHOSPHODIESTERASE 1/SENESCENCE-RELATED GENE 3* (*SRG3*; AT3G02040) (Cheng  
87 et al., 2011). Nevertheless, a subset of transcripts is specifically repressed under  $P_i$ -depleted  
88 conditions which can be accounted for by the induction of microRNAs (reviewed in Paz-Ares  
89 et al. (2022)), the induction of transcriptional repressors, as well as the modulation of genome  
90 accessibility (Barragán-Rosillo et al., 2021) through PHR1/PHLs activity.

91  $P_i$  is unique among the macronutrients in that it is the only root-supplied element which is  
92 directly consumed by photosynthesis (Heldt and Rapley, 1970; Dietz and Heber, 1984). It has  
93 been shown experimentally that under high- $CO_2$  and high-light conditions, photosynthesis can  
94 indeed become limited by  $P_i$  supply to the chloroplast, both under  $P_i$  depleted and nutrient-rich  
95 conditions (Dietz and Foyer, 1986; Sivak and Walker, 1986). However, whether rapid increase  
96 in photosynthetic activity affects  $P_i$  homeostasis of the cell, is still unclear. In this study, we  
97 show that increments in light intensity trigger an early nuclear transcriptional response  
98 characteristic of  $P_i$  depletion which depends on *PHR1* and *PHL1*. Processes regulated by  
99 PHR1/PHL1 upon increased illumination contribute to photosynthetic acclimation since  
100 *phr1 phl1* mutants showed metabolic alterations compared to the wildtype when subjected to  
101 high-light stress. Moreover, analysis of the starch biosynthesis-deficient *adg1 phr1 phl1* triple  
102 mutant revealed an important function of  $P_i$  signaling when triose phosphate utilization is  
103 impaired. Aspects of the growth defects observed for *adg1 phr1 phl1* phenocopy the *adg1 tpt-2*  
104 mutant, suggesting that triose phosphate partitioning strongly affects  $P_i$  homeostasis. Together,  
105 we propose that PHR1/PHL1 mediate rapid photosynthetic acclimation upon sudden increases  
106 in light intensity by using  $P_i$  as a previously unknown operational retrograde signal.

## 107 **Results**

### 108 **Acclimation to P<sub>i</sub> starvation is disturbed in *adg1 tpt-2***

109 Photoassimilate allocation and utilization in the chloroplast and cytosol mainly  
110 determine the rate of P<sub>i</sub> recycling from photosynthetic products. To address how the partitioning  
111 of phosphorylated assimilates affects P<sub>i</sub> homeostasis, we examined the phenotypes of mutants  
112 defective in starch biosynthesis (*adg1-1*) and chloroplastic triose phosphate export (*tpt-2*)  
113 during P<sub>i</sub> starvation in the presence of 14.61 mM (0.5 %) sucrose, and used anthocyanin  
114 production as a read-out for the induction of the P<sub>i</sub> starvation response. In accordance with  
115 previous reports (Nilsson et al., 2007), wildtype seedlings accumulated anthocyanins when  
116 transferred to P<sub>i</sub>-deficient conditions (Figure 1A, B). This was not observed for the *phr1-3 phl1*  
117 mutant. While *tpt-2* mutant seedlings were indistinguishable from the wildtype in terms of  
118 anthocyanin content, pigmentation was significantly enhanced upon P<sub>i</sub> starvation in *adg1-1*.  
119 Surprisingly, this effect was fully reversed in the double mutant *adg1 tpt-2* which even  
120 accumulated much lower amounts of anthocyanins than the wildtype (Figure 1B). Nevertheless,  
121 root responses to P<sub>i</sub> depletion such as root hair production were normal in *adg1 tpt-2* (Figure  
122 1A). Hence, increased anthocyanin production of *adg1-1* upon P<sub>i</sub> starvation almost fully relied  
123 on photoassimilate transport over the chloroplast envelope. To test whether increased  
124 anthocyanin accumulation in *adg1-1* also depends on the signaling pathway executed by  
125 PHR1/PHLs, we created a triple mutant by crossing *adg1-1* and *phr1-3 phl1*. The anthocyanin  
126 content did not increase in the *adg1 phr1 phl1* triple mutant in response to P<sub>i</sub> starvation (Figure  
127 1B), confirming a crucial function of PHR1/PHL1 signaling in this process even in the absence  
128 of ADG1 activity.

129 P<sub>i</sub> deprivation is also known to induce starch accumulation in a *PHR1*-dependent  
130 manner (Figure 1C and Supplemental Figure 1), which likely involves AGPase activity (Nilsson  
131 et al., 2007). Furthermore, also soluble sugar contents rise in wildtype plants upon P<sub>i</sub> limitation  
132 (Pant et al., 2015a). We reasoned that contrasting pigmentation behavior of the *adg1-1* and *adg1*  
133 *tpt-2* seedlings under P<sub>i</sub>-depleted conditions might be caused by differential sugar accumulation  
134 (Zirngibl et al., 2023). First, we analyzed starch contents of seedling shoots under P<sub>i</sub>-sufficient  
135 and -deficient conditions. While shoots of *tpt-2* showed slightly higher levels of starch than  
136 wildtype, P<sub>i</sub> depletion did not result in considerable starch production in *adg1-1* or any of the  
137 derived mutant lines (Figure 1C), confirming that the small AGPase subunit ADG1 is required  
138 for increased starch accumulation under P<sub>i</sub> starvation. In agreement with impaired starch  
139 biosynthesis, hexose levels were increased in *adg1-1* shoots under P<sub>i</sub> depletion compared to the

140 wildtype, and we observed a tendency towards higher sucrose levels in *adg1-1* (Figure 1C).  
141 None of these effects were seen in the *adg1 phr1 phl1* triple mutant, suggesting that sugar  
142 metabolism in *adg1-1* was under control of PHR1/PHL1 during P<sub>i</sub> depletion (Figure 1C).  
143 Surprisingly, sugar levels were not correlated to anthocyanin production in either *tpt-2* or *adg1*  
144 *tpt-2*: While P<sub>i</sub>-depleted shoots of *tpt-2* contained higher glucose levels than wildtype, the  
145 contents of all three soluble sugar species analyzed were similar between shoots of *adg1 tpt-2*  
146 and the wildtype when grown on sucrose-supplemented media (Fig. 1C). Thus, anthocyanin  
147 production in response to P<sub>i</sub> starvation was partially uncoupled from cellular sugar contents.  
148 Taken together, PHR1/PHL1 activity is required, but not sufficient for anthocyanin production  
149 under P<sub>i</sub> starvation, which furthermore depends on adequate metabolite partitioning between  
150 chloroplasts and the cytosol. Furthermore, the phenotypes of the *adg1 tpt-2* double mutant  
151 indicate that P<sub>i</sub> starvation responses are disturbed in this mutant.

152

### 153 **P<sub>i</sub> starvation gene expression is triggered by high light**

154 The low-P<sub>i</sub> phenotypes of *adg1-1* and *adg1 tpt-2* mutant lines indicated that P<sub>i</sub> starvation  
155 responses are affected by photoassimilate distribution and utilization. This raised the question  
156 whether photoassimilate turnover also impacts on P<sub>i</sub> homeostasis under non-starved conditions.  
157 More specifically, P<sub>i</sub> signaling might be modulated by naturally occurring changes in triose  
158 phosphate metabolism, for example upon an increase in light intensity. To address this, we  
159 tested low-P<sub>i</sub> marker gene expression upon sudden increments in photon flux density. Using  
160 quantitative RT-PCR (qRT-PCR), we first confirmed that in our experimental setup transcript  
161 levels of *SRG3*, *PS2*, *SPX1*, and *MGD3* were all strongly induced by P<sub>i</sub> starvation, which mainly  
162 depended on *PHR1/PHL1* (Supplemental Figure 2A). Additionally, we analyzed transcript  
163 levels of a putative vacuolar P<sub>i</sub> efflux transporter, *VPE1* (AT3G47420) (Ramaiah et al., 2011;  
164 Xu et al., 2019), and confirmed upregulation of this gene in the wildtype subjected to P<sub>i</sub>  
165 starvation which was again strongly attenuated in *phr1-1 phl1* mutants (Supplemental Figure  
166 2A). Furthermore, for the promoter sequences of *SPX1* (lacking the naturally occurring *NcoI*  
167 restriction site, *proSPX1<sup>GC</sup>*), *MGD3*, and *SRG3*, we observed that PHR1 was able to induce the  
168 expression of *promoter::LUC* fusion constructs when transiently expressed in mesophyll  
169 protoplasts (Supplemental Figure 2B), confirming that *SPX1*, *MGD3*, and *SRG3* are targets of  
170 PHR1.

171 To examine responses to enhanced illumination, we grew wildtype and *phr1-1 phl1*  
172 mutant plants under nutrient-rich conditions on soil in an 8/16 hours (light/dark) photoregime.

173 After 5 weeks, photon flux density was increased to  $320\pm 30 \mu\text{mol m}^{-2} \text{s}^{-1}$  (high light) while the  
174 control group was kept under growth light conditions of  $80\pm 5 \mu\text{mol m}^{-2} \text{s}^{-1}$ . Using qRT-PCR,  
175 we detected a pronounced upregulation of *SRG3*, *SPX1*, and *VPE1* transcripts in wildtype plants  
176 already after 20 min of exposure to high light compared to control plants, as well as a slight  
177 increase in *MGD3* and *PS2* transcript abundance (Figure 2). In all five cases, the upregulation  
178 of gene expression was attenuated within 125 min in high light (Figure 2), indicating that  
179 response to  $\text{P}_i$  shortage constitutes an early consequence of increased irradiance. Notably,  
180 induction of  $\text{P}_i$  starvation marker transcripts was not observed in *phr1-1 phl1* mutant plants  
181 (Figure 2). *PHR1* expression itself was reported to depend on light (Liu et al., 2017).  
182 Importantly however, increasing the light intensity to  $320\pm 30 \mu\text{mol m}^{-2} \text{s}^{-1}$  did not affect *PHR1*  
183 transcript levels under our experimental conditions (Supplemental Figure 3), consistent with  
184 the accumulation of *PHR1* transcript being only responsive to changes in the very low fluence  
185 range (Liu et al., 2017).

186 *GLUCOSE-6-PHOSPHATE/PHOSPHATE TRANSLOCATOR 2 (GPT2)* is a light  
187 responsive gene (Athanasίου et al., 2010) which was also described to be induced by  $\text{P}_i$   
188 starvation (Morcuende et al., 2007). Furthermore, high-light induced expression of *GPT2* was  
189 previously described to depend on *TPT* function (Kunz et al., 2010; Weise et al., 2019), and we  
190 noted that the promoter sequence of *GPT2* contains a *PHR1* binding motif (GTATATTC) close  
191 to the transcriptional start site. Therefore, we tested if the *GPT2* promoter could be activated  
192 by *PHR1* in a transient expression system using the *LUC* reporter gene. In fact, *PHR1*  
193 expression induced *LUC* reporter activity when protoplasts were co-transfected with the  
194 *proGPT2::LUC<sub>Firefly</sub>* construct (Supplemental Figure 2B). However, the responsiveness of  
195 *proGPT2* to *PHR1* expression was considerably lower than observed with the constructs  
196 harboring *proSPX1<sup>GC</sup>*, *proSRG3* or *proMGD3* upstream of the reporter CDS. Consistent with  
197 weak *PHR1*-mediated induction of *proGPT2* in protoplast assays, and in contrast to the other  
198 tested  $\text{P}_i$ -starvation responsive genes, *GPT2* was upregulated by high light in both wildtype and  
199 *phr1-1 phl1* after 45 minutes, and transcript levels continued to rise upon stress during the  
200 course of the analysis (Figure 2). This indicated that *PHR1/PHL1* are not involved in high-light  
201 mediated induction of *GPT2* expression. Moreover, we were not able to detect an effect of the  
202 *gpt2-1* allele (Niewiadomski et al., 2005) on carbohydrate accumulation under  $\text{P}_i$  depletion  
203 (Supplemental Figure 1), arguing against a major role of this gene for sugar homeostasis under  
204  $\text{P}_i$  starvation. Thus, metabolite transport over the chloroplast membrane likely creates another  
205 signal which is responsible for *GPT2* induction under high light. While this pathway is not

206 affected by *phr1-1 phl1* mutation, the double mutant fails to induce other P<sub>i</sub>-depletion  
207 responsive genes which are upregulated in the wildtype very early after a shift in light intensity.

208

### 209 **Metabolic responses to increased light are impaired in *phr1 phl1* mutants**

210 Given that transcription of P<sub>i</sub>-starvation responsive genes was rapidly induced by high  
211 light, we asked if this response was of physiological significance during acclimation to  
212 increased radiation. To investigate this, we determined the changes in adenylates, sugar, and  
213 starch contents that occurred within 90 min upon an increase in photon flux density from  
214  $80 \pm 5 \mu\text{mol m}^{-2} \text{s}^{-1}$  to  $320 \pm 30 \mu\text{mol m}^{-2} \text{s}^{-1}$  in rosette leaves of 5-weeks-old wildtype and  
215 *phr1-1 phl1* mutant plants. As shown in Figure 3A, increasing the light intensity caused a slight  
216 drop in ATP levels in leaves of *phr1-1 phl1* mutants, while no significant changes were seen in  
217 wildtype plants. Notably, the ratio of ATP/ADP was not affected by either the genotype or the  
218 high-light treatment (Figure 3A). In contrast, fructose, glucose, and sucrose levels increased in  
219 leaves of both wildtype and *phr1-1 phl1* mutants subjected to high light as compared to control  
220 light conditions (Figure 3B). Interestingly, total levels of glucose and fructose were slightly  
221 lower in *phr1-1 phl1* leaves subjected to high light compared to wildtype leaves (Figure 3B).  
222 However, the relative increments in sugar levels upon stress did not differ significantly between  
223 wildtype and *phr1-1 phl1* mutants (Figure 3C).

224 Unlike sugar levels, starch content under control conditions was higher in *phr1-1 phl1*  
225 mutants than in wildtype plants (Figure 3D). This may be related to the fact that *phr1-1 phl1*  
226 mutants manifest lower P<sub>i</sub> levels in the shoots (Wang et al., 2018a) which allosterically activates  
227 AGPase (Figueroa et al., 2022). Exposure to higher light intensities further increased starch  
228 content in both wildtype and *phr1-1 phl1* (Figure 3D). However, while the starch content of  
229 wildtype leaves increased by 1.98-fold relative to control conditions, *phr1-1 phl1* mutant plants  
230 exhibited a significantly lower increase by only 1.62-fold (Figure 3D). Thus, sequestration of  
231 photoassimilates in transitory starch under high light conditions was affected by loss of  
232 *PHR1/PHL1* function.

233 Since both P<sub>i</sub> starvation and high-light stress trigger anthocyanin production, we next  
234 analyzed the ability of *phr1 phl1* mutants to accumulate anthocyanins during high-light  
235 acclimation. As shown in Figure 3E, anthocyanin contents of *phr1 phl1* leaves after 3 days of  
236 high-light exposure were significantly lower than in wildtype leaves or in the single mutants  
237 *phr1-3* and *phl1*, while loss of *SPX1/2* function did not have any statistically significant effect.  
238 To exclude that *phr1 phl1* mutant plants were generally impaired in anthocyanin biosynthesis,



239 we subjected seedlings to chemically induced oxidative stress. Here, anthocyanin contents were  
240 not significantly different between wildtype, *phr1-3 phl1*, and *spx1 spx2* seedlings after 5 days  
241 of growth on paraquat-containing media (Supplemental Figure 4), indicating that anthocyanin  
242 biosynthesis was functional during reactive oxygen stress in *phr1-3 phl1* mutants.

243 Next, we asked whether metabolic abnormalities in the *phr1 phl1* mutants were related  
244 to differences in photosynthetic performance at the level of the thylakoid reactions. Therefore,  
245 we performed pulse-amplitude modulated (PAM) chlorophyll fluorometry on rosette leaves  
246 subjected to increased light. The efficiency of photosystem II photochemistry ( $\Phi$ PSII) dropped  
247 to the same extent in both wildtype and *phr1-1 phl1* mutants upon exposure to increased  
248 illumination for 125 min (Figure 4A). After 125 min of treatment, also the maximum efficiency  
249 of PSII ( $F_v/F_m$ ) had decreased significantly in the stressed plants of both genotypes (Figure 4B).  
250 As for  $\Phi$ PSII, no difference was observed for  $F_v/F_m$  between wildtype and *phr1-1 phl1*. Thus,  
251 *PHR1/PHL1* function likely affected adenylate levels, starch metabolism and anthocyanin  
252 pigmentation of leaves under high-light stress in a manner independent of the thylakoid  
253 reactions.

254

### 255 ***PHR1/PHL1* function is important when triose phosphate utilization is limited**

256 Our observations indicated that  $P_i$ -starvation signaling might be important during a shift  
257 to higher light intensities. We hypothesized that this might be related to transient imbalances of  
258 triose phosphate production and  $P_i$  recycling that occur upon changes in photosynthetic activity.  
259 In order to address this, we tried to genetically mimic the otherwise transient state of insufficient  
260  $P_i$  recycling from photosynthetic products. In the *adg1-1* mutant, disruption of starch  
261 biosynthesis leads to continuous limitation in triose phosphate utilization. Hence, we examined  
262 the phenotypes of the *adg1 phr1 phl1* triple mutant to assess the importance of *PHR1/PHL1*  
263 signaling during triose phosphate overaccumulation.

264 Strikingly, when grown under conditions with a short photoperiod (8 hours),  
265 *adg1 phr1 phl1* mutant plants exhibited a strong growth defect that was apparent in a reduction  
266 in both leaf size and leaf number compared to *adg1-1* single and *phr1-3 phl1* double mutants  
267 (Figure 5A, B). Under long-day conditions (16 hours photoperiod), the reduction in rosette size  
268 was less pronounced, but *adg1 phr1 phl1* mutant plants exhibited premature leaf senescence  
269 with symptoms already visible at the age of 25 days (Figure 5A, arrow). Accelerated leaf  
270 senescence is also seen in *phr1 phl1* double mutants particularly under  $P_i$  deprived conditions  
271 (Bustos et al., 2010) (Figure 1A), but initiates later at the age of approximately 35 days when

272 grown under standard conditions on soil (Figure 5B) (Wang et al., 2018a). Furthermore,  
273 transition to flowering was much delayed in *adg1 phr1 phl1* compared to the parental lines  
274 (Figure 5C). Notably, delayed onset of the regenerative phase is a phenotype already inherent  
275 to both the *adg1-1* (Matsoukas et al., 2013) and *phr1 phl1* (Supplemental Figure 5) mutants.

276 We noted that the photoperiod-dependent reduction in rosette size seen for  
277 *adg1 phr1 phl1* was reminiscent of the phenotype of the *adg1 tpt-2* mutant (Figure 5A). Thus,  
278 we tested the ability of *adg1 phr1 phl1* to adapt to higher light intensities, since high-light  
279 sensitivity was also reported for the *adg1 tpt-2* mutant (Schmitz et al., 2012). In fact, seedling  
280 shoot growth of *adg1 phr1 phl1* and *adg1 tpt-2* was reduced to a similar extent when grown  
281 under high-light conditions (Figure 5D and Supplemental Figure 6). Moreover, growth of  
282 *adg1 phr1 phl1* mutants under high light was promoted by exogenously supplied sucrose  
283 (Figure 5D), as it was described for *adg1 tpt-2* (Heinrichs et al., 2012; Schmitz et al., 2012).  
284 When seedlings were grown on vertically positioned petri dishes, it became evident that sucrose  
285 strongly stimulated root growth of both *adg1 phr1 phl1* and *adg1 tpt-2* particularly under high-  
286 light conditions (Supplemental Figure 7). Interestingly, when analyzing vertically grown  
287 seedlings, we observed a tendency for high-light sensitivity of shoot growth also for the *adg1-*  
288 *1* single and *phr1-3 phl1* double mutant lines (Supplemental Figure 6A). Likewise, this effect  
289 could be alleviated by exogenously supplied sucrose. Notably, high-light sensitivity of *phr1-3*  
290 *phl1* was more pronounced under high-P<sub>i</sub> (2.5 mM) than low-P<sub>i</sub> (0.25 mM) growth conditions  
291 (Supplemental Figure 6A), supporting the hypothesis that PHR1/PHL1 play a role for high-  
292 light adaptation also under P<sub>i</sub> sufficiency. It was concluded from these experiments that lack of  
293 *PHR1/PHL1* compromises plant growth under conditions of high triose phosphate  
294 accumulation such as high light or when starch biosynthesis is genetically blocked.

295

## 296 **Carbohydrate signaling is affected during P<sub>i</sub> deprivation**

297 Seedling growth of *phr1-3 phl1* (Supplemental Figure 6A) and *adg1 phr1 phl1* (Figure  
298 5D and Supplemental Figure 7) was supported by sucrose supplementation particularly under  
299 high light, and high-light induced starch accumulation was reduced in *phr1-1 phl1* mutants  
300 (Figure 3D). Both observations suggest that *phr1 phl1* mutation leads to alterations in  
301 carbohydrate metabolism. To address the question of how carbohydrate signaling might be  
302 modulated under conditions when PHR1 activity is high, we re-analyzed published  
303 transcriptome data obtained from seedlings subjected to P<sub>i</sub> depletion (Bustos et al., 2010), and  
304 from rosette plants exposed to a low CO<sub>2</sub> environment (Bläsing et al., 2005). Among the

305 transcripts which were most strongly upregulated in shoots of *phr1-1 phl1* under P<sub>i</sub> depletion  
306 relative to the wildtype, the majority was repressed by P<sub>i</sub> depletion in the wildtype  
307 (Supplemental Figure 8). This supports a function of PHR1/PHL1 in the downregulation of  
308 certain transcripts under P<sub>i</sub> depletion, as previously suggested (Bustos et al., 2010).  
309 Interestingly, we noted that many of these transcripts were also responsive to carbon starvation  
310 (Bläsing et al., 2005) (Supplemental Figure 8).

311 We chose four of the transcripts which were upregulated in *phr1-1 phl1* compared to  
312 the wildtype under P<sub>i</sub> starvation for further analysis: The circadian regulators *BASIC LEUCINE*  
313 *ZIPPER 63* (*bZIP63*) (Baena-González et al., 2007; Frank et al., 2018) and *REVEILLE 1*  
314 (*RVE1*) (Rawat et al., 2009), as well as *BETA-XYLOSIDASE1* (*BXL1*), and  
315 *SENESCENCE1/DARK INDUCIBLE1* (*SEN1/DIN1*), a putative target gene of bZIP63  
316 (Matiolli et al., 2011). In qRT-PCR analysis of seedlings grown on sucrose-containing media  
317 with or without P<sub>i</sub>, both *bZIP63* and *BXL1* were down-regulated in shoots of wildtype seedlings  
318 exposed to P<sub>i</sub> depletion, whereas no significant changes were detected for *phr1-1 phl1* mutants  
319 (Figure 5E), potentially reflecting sugar accumulation in the wildtype (Supplemental Figure 1).  
320 In contrast, transcript levels of *SEN1* and *RVE1* were highly increased in *phr1-1 phl1* mutants  
321 under P<sub>i</sub> deprivation, but no significant changes were seen in the wildtype background (Figure  
322 5F). Thus, expression of carbohydrate responsive genes, including circadian-clock associated  
323 genes, differs between wildtype and *phr1-1 phl1* mutants under P<sub>i</sub> depletion.

324

### 325 **Transcription in the *adg1 tpt-2* mutant exhibits a constitutive P<sub>i</sub>-starvation signature**

326 The phenotypic similarities of the *adg1 phr1 phl1* and *adg1 tpt-2* mutants suggested that  
327 triose phosphate partitioning and P<sub>i</sub> signaling share some physiological consequences,  
328 supporting that triose phosphate utilization affects cellular P<sub>i</sub> homeostasis. To assess if  
329 PHR1/PHLs activity was altered in *adg1 tpt-2*, we analyzed P<sub>i</sub>-starvation marker gene  
330 expression in rosette leaves of plants grown for 5 weeks under an 8-hours light regime and a  
331 moderate light intensity of 90±10 μmol m<sup>-2</sup> s<sup>-1</sup>. Surprisingly, *SRG3*, *PS2*, *SPX1*, *VPE1* and  
332 *MGD3* were all significantly upregulated in shoots of soil-grown *adg1 tpt-2* plants compared  
333 to wildtype or the single *adg1-1* and *tpt-2* mutants (Figure 6A), indicating high activity of PHR1  
334 in shoots of *adg1 tpt-2*. Moreover, *bZIP63* expression was significantly reduced in both *adg1-1*  
335 and *adg1 tpt-2*, whereas we observed a slight increase in *bZIP63* transcript levels in rosette  
336 leaves of *tpt-2* mutants (Figure 6A). To test if altered expression of P<sub>i</sub>-starvation associated  
337 genes in *adg1 tpt-2* was linked to reduced P<sub>i</sub> levels in the shoots of the mutant, we next

338 determined  $P_i$  contents in 5-weeks-old rosette leaves grown on soil under moderate light.  
339 Interestingly, the  $P_i$  content was not reduced in shoots of *adg1 tpt-2* compared to the wildtype,  
340 but  $P_i$  levels were even found to be higher than in *adg1-1* single mutants (Figure 6B). Thus,  $P_i$   
341 loading of the shoots was not impaired in *adg1 tpt-2*, and  $P_i$ -starvation responsive genes were  
342 instead constitutively upregulated in *adg1 tpt-2* rosette leaves, indicating high PHR1 activity  
343 even under nutrient-sufficient physiological conditions in this mutant.

344

## 345 **Discussion**

346 The observations presented herein establish that the  $P_i$  response machinery involving  
347 the transcription factors PHR1 and PHL1 is capable of sensing early high-light stress, and we  
348 provide evidence that *PHR1/PHL1* contribute to the rapid adjustment of carbohydrate  
349 metabolism during changes in light intensity.  $P_i$  consumption by photosynthesis is thus  
350 hypothesized to generate a chloroplast-to-nucleus retrograde signal. In fact,  $P_i$  qualifies as a  
351 subcellular signal by a number of criteria: 1)  $[P_i]$  changes immediately and gradually in response  
352 to photoassimilation (Stitt et al., 1980; Dietz and Heber, 1984; Robinson and Giersch, 1987);  
353 2) multiple transport proteins at the organellar membranes (Fabiańska et al., 2019) ensure rapid  
354 transmission of the  $[P_i]$  signal; 3) signal propagation is based on diffusion and does not rely on  
355 acceptor and donor molecules; 4)  $P_i$  exhibits low toxicity within a wide concentration range; 5)  
356 a highly responsive signaling machinery is present in the cytosol and nucleus.

357

### 358 **Increase in light intensity creates a transient low- $P_i$ signal**

359 Under conditions where carboxylation exceeds subsequent metabolic capacities of the  
360 chloroplast, such as high light (Laisk et al., 1991), low temperature (Stitt and Grosse, 1988),  
361 and low oxygen (Kleckner et al., 2014), large pools of 3-phosphoglycerate may build up which  
362 can enter the cytosol via the TPT (Schneider et al., 2002). By the nature of the transport  
363 mechanism, this depletes the cytosol of  $P_i$ , and it is assumed that  $P_i$  import from the vacuole is  
364 too slow to balance against very short-term changes in  $P_i$  demand (Woodrow et al., 1984). In  
365 accordance with these considerations, we found that transcription exhibits a  $P_i$ -starvation  
366 signature in *Arabidopsis* rosette leaves subjected to light increase already after 20 min of stress  
367 (Figure 2). This response depended on *PHR1/PHL1* function, indicating that light stress  
368 activated the cytosolic and nuclear  $P_i$  sensing machinery (Figure 7). PHR1 target genes which  
369 showed enhanced expression in our experimental setup included *SRG3*, *SPX1*, and *VPE1*, and

370 all three transcripts also showed early enrichment upon high-light treatment within a time-  
371 resolved transcriptome analysis previously described by Huang et al. (2019). Both *SRG3* and  
372 *VPE1* expression might be suitable to rapidly increase  $P_i$  availability in the cytosol via  
373 glycerophosphodiester turnover (Cheng et al., 2011) and vacuolar  $P_i$  efflux (Xu et al., 2019),  
374 respectively. In contrast, *SPX1* upregulation potentially contributes to the rapid tempering of  
375 the transcriptional response which was quenched already after 2 hours of treatment (Figure 2).  
376 Next to negative feed-back by SPX1, adjustment of triose phosphate turnover by post-  
377 translational activation of sucrose (Stitt et al., 1983; Preiss, 1984) and starch (Preiss, 1988;  
378 Hendriks et al., 2003) biosynthesis would be expected to attenuate any condition of light-  
379 induced  $P_i$  depletion within relatively short time. Therefore, long-term  $P_i$ -starvation responses  
380 such as lipid remodeling are rather unlikely to occur upon light intensity increases as long as  
381 higher  $P_i$  demand can be sufficiently covered by uptake via the roots or release of  $P_i$  storage  
382 within the mesophyll cell. Consistent with this assumption, induction of *MGD3* transcript was  
383 moderate in our experimental setup (Figure 2). Interestingly however, van Rooijen et al. (2018)  
384 observed upregulation of PHR1 target genes with involvement in lipid remodeling after 1 hour  
385 of irradiance increase. Thus, it will be exciting to learn from future experiments whether  $P_i$   
386 signaling also contributes to the changes that can be seen in the lipid composition of leaves  
387 under different light conditions (Yu et al., 2021).

388

### 389 **$P_i$ sensing impacts on carbohydrate and energy metabolism upon light increase**

390 The induction of genes related to  $P_i$  mobilization upon high light might be considered a  
391 transcriptional feedback response initiated in order to sustain substrate supply for metabolic  
392 reactions. Classification of  $P_i$  as a retrograde signal requires, beyond that,  $P_i$  signaling to affect  
393 further physiological processes by calibrating nuclear gene expression according to the status  
394 of the plastids. Crucially, this study shows that mutants defective in *PHR1* and *PHL1* which  
395 fail to mount a transcriptional response related to  $P_i$  starvation, develop metabolic abnormalities  
396 in the leaves within only 1.5 hours of high-light treatment (Figure 3A-D), and exhibit lower  
397 levels of anthocyanin pigmentation after 3 days of treatment (Figure 3E). ATP levels measured  
398 after 1.5 hours of high-light exposure were significantly lower in leaves of *phr1-1 phl1* mutant  
399 plants compared to wildtype plants (Figure 3A), whereas  $\Phi$ PSII values were indistinguishable  
400 (Figure 4A). Given that  $\Phi$ PSII can be interpreted as a measure of the linear electron transport  
401 rate (Maxwell and Johnson, 2000), this indicates that ATP synthesis at the thylakoids was likely  
402 not affected by loss of *PHR1/PHL1* function. This is consistent with the assumption that  $P_i$

403 sequestration upon photosynthetic activity does not compromise stromal  $P_i$  levels and thus ATP  
404 synthesis as long as phosphorylated metabolites are exchanged with the cytosol via  $P_i$  antiport  
405 systems (Robinson and Giersch, 1987). In contrast, it would be conceivable that the  $P_i$   
406 concentration outside of the chloroplast might drop below levels required for efficient  
407 mitochondrial ATP synthesis in the *phr1-1 phl1* mutant. In fact, a decline in ATP levels can  
408 also be observed in plants under  $P_i$ -deficient growth conditions (Zhu et al., 2019; Riemer et al.,  
409 2021), but the reason for this is currently unknown.

410 While starch levels under standard light conditions were slightly higher in *phr1-1 phl1*  
411 rosettes compared to wildtype, the high-light induced relative increase in starch content was  
412 considerably higher in wildtype leaves compared to the mutant (Figure 3D). This delay in the  
413 activation of starch biosynthesis is remarkable, given that post-translational activation of  
414 AGPase by the 3-PGA/ $P_i$  ratio is probably high in *phr1-1 phl1* leaves which manifest  
415 chronically low  $P_i$  contents (Wang et al., 2018a). Similar to what can be seen under  $P_i$   
416 deprivation (Supplemental Figure 1) (Nilsson et al., 2007), the difference in starch  
417 accumulation observed between wildtype and *phr1-1 phl1* mutants upon transfer to high light  
418 was not reflected by changes in soluble sugar contents (Figure 3B, C). Together with our finding  
419 that photosynthetic capacity is wildtype-like in *phr1-1 phl1* mutants subjected to high-light  
420 stress (Figure 4), this suggests that starch production is rather not limited by photosynthetic  
421 precursor production in *phr1-1 phl1*. Hence, it is likely that PHR1/PHL1 directly regulate  
422 photoassimilate partitioning towards starch biosynthesis. Expression of *APL3* (AT4G39210)  
423 encoding a large subunit of AGPase, or *GGBS1* (AT1G32900), coding for a granule-bound  
424 starch synthase have been described to be induced by  $P_i$  starvation (Morcuende et al., 2007;  
425 Bustos et al., 2010; Wang et al., 2018b), and might contribute to both  $P_i$ -starvation and high-  
426 light induced starch accumulation.

427

### 428 **$P_i$ signaling is crucial under conditions of triose-phosphate oversupply**

429 Prevention of starch production during  $P_i$  restriction leads to higher sugar and  
430 anthocyanin levels in the shoots (Figure 1). The observation is consistent with sugars being  
431 formed upon recycling of phosphorylated metabolites (Morcuende et al., 2007), and starch  
432 serving as a carbon sink in  $P_i$ -deprived plants (Hammond and White, 2008; MacNeill et al.,  
433 2017). Neither sugar accumulation, nor transitory starch or anthocyanin production take place  
434 in *phr1 phl1* mutant seedlings subjected to  $P_i$  depletion (Figure 1 and Supplemental Figure 1).  
435 Nevertheless, prohibition of starch biosynthesis by introduction of the *adg1-1* allele into this

436 mutant background produced a pronounced growth defect already visible at the seedling stage  
437 (Figure 5A, B, D and Supplementary Figures 6, 7). Growth of the *adg1 phr1 phl1* triple mutant  
438 was further impaired by higher light intensities (Figure 5D and Supplemental Figure 6), a  
439 condition that reinforces triose phosphate generation. These observations lead to the conclusion  
440 that *PHR1/PHL1* function is crucial in the *adg1-1* knockout situation, demonstrating the  
441 necessity for low- $P_i$  signaling when photoassimilate consumption is constrained. Next to  
442 growth retardation, the *adg1 phr1 phl1* mutant showed a delay in the onset of flowering (Figure  
443 5C), and benefited from exogenous sucrose supply in terms of both shoot and root growth  
444 (Figure 5D and Supplemental Figures 6, 7). Both late flowering (Wahl et al., 2013) and  
445 inhibition of primary root growth (Smith and Stitt, 2007) indicate that *adg1 phr1 phl1* plants  
446 suffer from carbohydrate starvation in the absence of external sucrose supply.

447 Interestingly, transcriptional changes observed on wildtype and *phr1-1 phl1* mutant  
448 plants under  $P_i$  deprivation also indicate that *PHR1/PHL1* maintain sugar homeostasis when  $P_i$   
449 availability is low (Figure 5E, F and Supplemental Figure 8). In agreement, strong increments  
450 in the levels of amino acids and oligosaccharides such as raffinose and kestose were reported  
451 for wildtype but not *phr1* mutants under  $P_i$  depletion (Pant et al., 2015a). Notably,  
452 oligosaccharide production facilitated by *PHR1/PHL1* might serve as an alternative  
453 carbohydrate sink in the *adg1-1* mutant, and could support carbon supply of the starchless  
454 mutant during the night. This would be consistent with the observation that *adg1 phr1 phl1* was  
455 more strongly constrained by diel cycles with short light phases (Figure 5A). Similarly,  
456 oligosaccharide and amino acid accumulation triggered by the low- $P_i$  signaling module could  
457 support carbohydrate homeostasis during high-light stress by maintaining  $P_i/C(N)$  balance, and  
458 might even be suitable to prepare for potential osmotic stress as a likely consequence of high  
459 light in a natural environment. In line with this, a function of *PHR1/PHL1* in proline  
460 accumulation and drought resistance has been reported (Aleksza et al., 2017; Scheible et al.,  
461 2023). It is difficult to dissect direct effects of  $P_i$  signaling from secondary consequences of  $P_i$ -  
462 deprived metabolism. Thus, metabolic differences of *adg1 phr1 phl1* mutants grown under  
463 short and long photoperiods might reveal new insights into how carbon fluxes are modulated  
464 by  $P_i$  signaling.

465

#### 466 **$P_i$ signaling is affected in *adg1 tpt-2***

467 Strikingly, growth defects and high-light sensitivity of *adg1 phr1 phl1* are paralleled by  
468 the phenotypes of the *adg1 tpt-2* mutant (Figure 5A, D and Supplemental Figures 6, 7),

469 indicating that photoassimilate allocation and  $P_i$  signaling to some extent overlap in terms of  
470 their physiological consequences. Even under  $P_i$  sufficient growth conditions, we found that  
471 *adg1 tpt-2* exhibits a signature of  $P_i$ -starvation responsive gene expression (Figure 6), raising  
472 the question how insufficient export of photosynthetic products could generate a situation of  
473 high PHR1 activity. In the *adg1 tpt-2* mutant, a pronounced fraction of cytosolic/chloroplastic  
474  $P_i$  can be assumed as metabolically unavailable, given that starch biosynthesis is prevented by  
475 *adg1-1* mutation, while sucrose production during the course of the day remains at much lower  
476 levels compared to *adg1-1* (Schmitz et al., 2012) (Figure 7). Hence, bulk release of  $P_i$  in *adg1*  
477 *tpt-2* might be restricted to glycolysis and vacuolar phosphatase activity acting on  
478 phosphorylated intermediates such as phosphoenolpyruvate (Ohnishi et al., 2018). This would  
479 cause unequal intracellular pool sizes of free  $P_i$ , facilitating PHR1 activity in the  
480 cytosol/nucleus, while vacuolar  $P_i$  stores are high (Figure 6).

481 In fact, imbalances of intracellular  $P_i$  pools would affect both *PHR1*-dependent and  
482 independent (Osorio et al., 2019; Nam et al., 2021)  $P_i$ -responsive pathways. Such inadequate  
483 signaling could even contribute to the pleiotropic defects observed for *adg1 tpt-2* mutants  
484 (Schmitz et al., 2012), for example by altering lipid composition, or by the regulation of  
485 photosynthesis-associated genes (Morcuende et al., 2007; Bustos et al., 2010; Barragán-Rosillo  
486 et al., 2021; Nam et al., 2021). Interestingly, we also found that transcript levels of the circadian  
487 regulator *bZIP63* were downregulated both by  $P_i$  depletion (Figure 5E), and in the *adg1 tpt-2*  
488 mutant (Figure 6). Given that *adg1 tpt-2* is characterized by overall low carbohydrate levels  
489 (Schmitz et al., 2012), *bZIP63* expression appears to be uncoupled from sugar levels in this  
490 mutant situation. Our observations open up the possibility that  $P_i$  signaling could be involved  
491 in this regulation which will be an exciting topic to address in the future.

492

## 493 **Conclusions**

494 High-light stress requires immediate responses to avert damage to cellular components.  
495 As a potential mode of sensing excess photosynthetic activity, we describe a function of the  $P_i$ -  
496 sensing machinery involving PHR1 and PHL1 transcription factors under nutrient replete  
497 growth conditions. We propose that  $P_i$  sequestration into phosphorylated photoassimilates and  
498 metabolite exchange across the chloroplast membrane causes transient  $P_i$  restriction in the  
499 cytosol and nucleus. This activates PHR1/PHL1 proteins to mobilize cellular  $P_i$  and to support  
500 acclimation responses such as starch biosynthesis. The finding that  $P_i$  signaling is disturbed in



501 the *adg1 tpt-2* mutant emphasizes that PHR1/PHL activity constitutes a so-far underestimated  
502 contributor to retrograde signaling of photosynthetic status.

503

## 504 **Materials and Methods**

### 505 **Plant material**

506 All Arabidopsis plants used in this study are in the background of the Columbia-0  
507 accession. The *phr1-3* (AT4G28610; SALK\_067629C) (Nilsson et al., 2007) and *phl1*  
508 (AT5G29000; SAIL\_731\_B09) (Klecker et al., 2014) lines were described previously and the  
509 derived homozygous double mutant *phr1-3 phl1* was a kind gift of Angelika Mustroph  
510 (University of Bayreuth). The double mutant *phr1-1 phl1* (Bustos et al., 2010) was backcrossed  
511 to *phl1* in order to remove a transgene containing the *NPTII* cassette which was previously  
512 introduced for isolation of the *phr1-1* allele (Rubio et al., 2001). All experiments were  
513 performed with the homozygous double mutant *phr1-1 phl1* lacking the *NPTII* cassette. The  
514 double mutant *spx1 spx2* was described earlier (Puga et al., 2014). Knockout lines *adg1-1*  
515 (At5g48300) (Lin et al., 1988), *tpt-2* (At5g46110; SALK\_073707.54.25.x) and *adg1 tpt-2*  
516 (Schmitz et al., 2012) were kindly provided by Rainer E. Häusler (University of Cologne).  
517 *gpt2-1* (AT1G61800; GK-454H06) was obtained from The Nottingham Arabidopsis Stock  
518 Centre (NASC) and was described previously (Niewiadomski et al., 2005). Primer sequences  
519 used for genotyping are listed in Table S1. Homozygous insertion mutants were verified using  
520 the following primer combinations: *PHR1* WT: PHR1\_F/PHR1\_R; *phr1-3* T-DNA:  
521 LBb1/PHR1\_R; *PHL1* WT: PHL1\_F/PHL1\_R; *phl1* T-DNA: PHL1\_F/LB3; *TPT* WT:  
522 TPT\_F/TPT\_R; *tpt-2* T-DNA: *tpt-2*\_F/LBb1; *GPT2* WT: GPT2\_F/GPT2\_R; *gpt2-1* T-DNA:  
523 GK-LB/GPT2\_R. To generate the *adg1 phr1 phl1* triple mutant, *adg1-1* was crossed to *phr1-3*  
524 *phl1*. Homozygous *adg1-1* mutants were identified by screening for starch-free phenotypes by  
525 iodine staining at the end of the photoperiod. Homozygosity of the *phr1-1* allele was verified  
526 by Sanger sequencing (Macrogen Europe, Amsterdam) of the PCR product of  
527 PHR1\_F/PHR1\_R using primer PHR1\_R.

528

### 529 **Cultivation conditions**

530 Seeds were stratified for 64 hours at 4°C in the dark. For vegetative growth, plants were  
531 germinated and grown in an 8 h/16 h (light/dark) cycle on soil consisting of seeding compost,  
532 universal soil, and vermiculite mixed in a 3:3:1 ratio. For high-light experiments, the plants

533 were additionally fertilized once directly after pricking at the age of 10 days using a complete  
534 mineral mixture (Wuxal Super, Aglukon Spezialduenger, Duesseldorf, Germany) according to  
535 the manufacturer's instructions. For seedling experiments, seeds were surface sterilized by  
536 chlorine gas exposure and transferred to solidified Arabidopsis growth media as described in  
537 the figure legends. Seedlings were grown under 16 h/8 h light/dark cycles. For paraquat  
538 treatments, seedlings were germinated on agar-solidified media containing full-strength  
539 Murashige and Skoog (MS) salts and grown for 10 days before transfer to MS media with or  
540 without 1  $\mu\text{M}$  paraquat dichloride hydrate (#36541, Riedel-de Haën, Hannover, Germany). If  
541 not indicated otherwise, growth light was set to  $90\pm 10 \mu\text{mol m}^{-2} \text{sec}^{-1}$  and monitored using an  
542 illuminance meter.

543

#### 544 **P<sub>i</sub>-starvation experiments**

545 For P<sub>i</sub>-starvation experiments, seeds were germinated on medium containing MS salts  
546 at full strength together with 0.8 % (w/v) phytoagar (Duchefa Biochemie, Haarlem, The  
547 Netherlands) and 0.5 % (w/v) sucrose. After 5-10 days of growth (see figure legends), seedlings  
548 were transferred to P<sub>i</sub> media (0.5 % (w/v) sucrose; 20 mM 2-(N-Morpholino)-ethane sulphonic  
549 acid; 2.5 mM KNO<sub>3</sub>; 1 mM MgSO<sub>4</sub>; 1 mM Ca(NO<sub>3</sub>)<sub>2</sub>; 2.5 mM KH<sub>2</sub>PO<sub>4</sub>; 25  $\mu\text{M}$  Fe-EDTA;  
550 35  $\mu\text{M}$  H<sub>3</sub>BO<sub>3</sub>; 7  $\mu\text{M}$  MnCl<sub>2</sub>; 0.25  $\mu\text{M}$  CuSO<sub>4</sub>; 0.5  $\mu\text{M}$  ZNSO<sub>4</sub>; 0.1  $\mu\text{M}$  NaMoO<sub>4</sub>; 5  $\mu\text{M}$  NaCl;  
551 0.005  $\mu\text{M}$  CoCl<sub>2</sub>; pH 6) solidified by 0.8 % (w/v) agar (adopted from Härtel et al. (2000)). For  
552 P<sub>i</sub> depleting conditions, KH<sub>2</sub>PO<sub>4</sub> was omitted, and Fe-EDTA was reduced to 10  $\mu\text{M}$  in order to  
553 minimize low-P<sub>i</sub> induced iron toxicity (Ward et al., 2008). Seedling shoots were harvested after  
554 7-8 days of growth on P<sub>i</sub> differing media (see figure legends). For horizontally grown seedlings,  
555 MS salts were used at ½ concentrations and 0.6 % (w/v) agar were applied. For the experiment  
556 shown in Figures S6 and S7, P<sub>i</sub> medium was used containing either 0.25 mM KH<sub>2</sub>PO<sub>4</sub>/10  $\mu\text{M}$   
557 Fe-EDTA, 2.5 mM KH<sub>2</sub>PO<sub>4</sub>/25  $\mu\text{M}$  Fe-EDTA, or 2.5 mM KH<sub>2</sub>PO<sub>4</sub>/25  $\mu\text{M}$  Fe-EDTA +50 mM  
558 sucrose.

559

#### 560 **Vector construction**

561 Standard molecular cloning procedures were applied. Primer sequences used for cloning  
562 are listed in table S1. The firefly *LUCIFERASE* reporter plasmid *pBT10-promGD3::LUC<sub>Firefly</sub>*  
563 and the *pHBTL-p35S::3HA-GFP* effector plasmid (Klecker et al., 2014), as well as the *pBT10-*  
564 *p35S::LUC<sub>Renilla</sub>* normalization plasmid (Bäumler et al., 2019) have been described elsewhere.

565 For details on cloning *proSPXI<sup>GC</sup>*, *proSRG3*, *proMGD3*, *proGPT2*, and the *PHR1* effector  
566 construct, refer to the supplemental methods.

567

### 568 **Anthocyanin determination**

569 Anthocyanin contents were determined with few changes as described in  
570 (Vandenbussche et al., 2007). In brief, 40-70 mg of seedling shoots or rosette leaf material were  
571 frozen in liquid nitrogen and ground in a bead mill (MM400, Retsch, Haan, Germany). The  
572 frozen powder was resuspended in 300  $\mu$ l of methanol containing 1 % HCl. After vortex-mixing  
573 for 15 sec, cell debris was pelleted by centrifugation for 15 min at >14,000 g, 4°C. The  
574 supernatant was mixed with 200  $\mu$ l water and 500  $\mu$ l chloroform by vortexing for 15 sec. After  
575 15 min centrifugation at 17,900 g, 4°C, the upper phase was diluted in methanol to measure the  
576 absorbance at 535 nm and 630 nm using a spectrophotometer (Specord 200 Plus, Analytik Jena,  
577 Jena, Germany).

578

### 579 **Measurements of starch, soluble sugars, and adenylates**

580 Carbohydrates were determined by the Warburg optical test and adenylates were  
581 assessed based on luciferase activity. Both procedures were described previously (Mustroph et  
582 al., 2006), for details see supplemental methods.

583

### 584 **Determination of P<sub>i</sub> contents**

585 Free P<sub>i</sub> was determined in leaf tissue based on the method described by (Ames, 1966)  
586 with some modifications partially based on (Sakuraba et al., 2018). For detail see supplemental  
587 methods.

588

### 589 **RNA extraction and cDNA synthesis**

590 Plant material was harvested under the respective experimental conditions and instantly  
591 frozen in liquid nitrogen. The tissue was ground in a bead mill, and RNA was extracted using  
592 Bioline TRIsure (Meridian Bioscience, Cincinnati, United States) according to the  
593 manufacturer's instructions. The quality of the RNA was assessed by screening A<sub>260</sub> and A<sub>280</sub>.  
594 For qRT-PCR analysis, 1  $\mu$ g of RNA was treated with DNase I (Thermo Fisher Scientific,  
595 Waltham, United States) according to product instructions before application in reverse

596 transcription using oligo(dT)<sub>15</sub> and RevertAid Reverse Transcriptase (Thermo Fisher  
597 Scientific). Complementary DNA was diluted by a factor of 50 for use as template in qPCR  
598 analysis. qPCR was performed in technical triplicates using SsoAdvanced Universal SYBR  
599 Green Supermix (Bio-Rad, Hercules, United States) on a CFX Connect Real-time System (Bio-  
600 Rad). Transcript levels were normalized to the levels of *PP2A* transcript and calculated as  
601  $1000 \cdot 2^{-\Delta CT}$ . Primer sequences are listed in table S1.

602

### 603 **Protoplast isolation, transfection and transactivation assay**

604 Leaf mesophyll protoplasts were isolated using the “Tape-Arabidopsis Sandwich”  
605 method (Wu et al., 2009) with minor modifications. For details, see supplemental methods.

606

### 607 **Chlorophyll fluorescence measurements**

608 For the determination of the quantum yield of photosystem II photochemistry  
609 ( $(F_m' - F')/F_m'$  ( $\Phi_{PSII}$ ), as well as the maximum efficiency of photosystem II ( $F_v'/F_m'$ ), pulse-  
610 amplitude-modulated fluorescence measurements (PAM) of chlorophyll fluorescence were  
611 conducted using a Junior-PAM (Walz, Effeltrich, Germany). Here, to calculate chlorophyll  
612 fluorescence parameters using the saturating pulse method (Schreiber et al., 1986), one large  
613 rosette leaf was held between two magnets and subjected to 10 seconds of actinic light  
614 irradiance set to control light intensity ( $80 \pm 5 \mu\text{mol m}^{-2} \text{sec}^{-1}$ ), followed by a saturation light  
615 pulse.

616

### 617 **Statistical analysis**

618 Statistical analyses were performed with Microsoft Office Excel using the Real  
619 Statistics Resource Pack software ([www.real-statistics.com](http://www.real-statistics.com)).

620

### 621 **Funding information**

622 This research was funded by the University of Bayreuth.

## 623 **Acknowledgements**

624 We thank Stephan Clemens and Angelika Mustroph for helpful discussions and  
625 comments on the manuscript, as well as for providing infrastructure and equipment. We thank  
626 Kristina Munzert for help with experiments.

627

## 628 **Author contributions**

629 M. K. designed the research, analyzed data, and wrote the paper; L. A., M. M., A. H.,  
630 and M. K. performed research.

631

## 632 **Supplemental Data**

633 **Supplemental Figure 1** Changes in sugar and starch contents under P<sub>i</sub> depletion.

634 **Supplemental Figure 2** Expression of selected P<sub>i</sub>-starvation responsive genes is activated by  
635 PHR1/PHL1.

636 **Supplemental Figure 3** *PHR1* transcript levels are not affected by short-time high-light  
637 exposure.

638 **Supplemental Figure 4** Anthocyanin production of P<sub>i</sub> signaling mutants under ROS stress.

639 **Supplemental Figure 5** Delayed onset of flowering in *phr1-1 phl1* mutants.

640 **Supplemental Figure 6** Quantification of shoot fresh weights of seedlings grown under low  
641 and high light.

642 **Supplemental Figure 7** Root growth of *adg1 phr1 phl1* and *adg1 tpt-2* responds to  
643 exogenously supplied sucrose.

644 **Supplemental Figure 8** Carbohydrate responsive gene expression is affected under P<sub>i</sub>  
645 starvation.

646 **Supplemental Table 1** List of primer sequences used in this study.

647 **Supplemental Methods**

648

649 **REFERENCES**

- 650 **Aleksza D, Horváth G V., Sándor G, Szabados L** (2017) Proline accumulation is regulated  
651 by transcription factors associated with phosphate starvation. *Plant Physiol* **175**: 555–567
- 652 **Ames BN** (1966) [10] Assay of inorganic phosphate, total phosphate and phosphatases.  
653 *Methods Enzymol.* pp 115–118
- 654 **Athanasίου K, Dyson BC, Webster RE, Johnson GN** (2010) Dynamic acclimation of  
655 photosynthesis increases plant fitness in changing environments. *Plant Physiol* **152**: 366–  
656 73
- 657 **Baena-González E, Rolland F, Thevelein JM, Sheen J** (2007) A central integrator of  
658 transcription networks in plant stress and energy signalling. *Nature* **448**: 938–42
- 659 **Barragán-Rosillo AC, Peralta-Alvarez CA, Ojeda-Rivera JO, Arzate-Mejía RG, Recillas-  
660 Targa F, Herrera-Estrella L** (2021) Genome accessibility dynamics in response to  
661 phosphate limitation is controlled by the PHR1 family of transcription factors in  
662 *Arabidopsis*. *Proc Natl Acad Sci U S A* **118**: e2107558118
- 663 **Bäumler J, Riber W, Klecker M, Müller L, Dissmeyer N, Weig AR, Mustroph A** (2019)  
664 *AtERF#111/ABR1* is a transcriptional activator involved in the wounding response. *Plant*  
665 *J* **100**: 969–990
- 666 **Bechtold U, Richard O, Zamboni A, Gapper C, Geisler M, Pogson B, Karpinski S,  
667 Mullineaux PM** (2008) Impact of chloroplastic- and extracellular-sourced ROS on high  
668 light-responsive gene expression in *Arabidopsis*. *J Exp Bot* **59**: 121–33
- 669 **Bläsing OE, Gibon Y, Günther M, Höhne M, Morcuende R, Osuna D, Thimm O, Usadel  
670 B, Scheible W-R, Stitt M** (2005) Sugars and circadian regulation make major  
671 contributions to the global regulation of diurnal gene expression in *Arabidopsis*. *Plant Cell*  
672 **17**: 3257–81
- 673 **Bustos R, Castrillo G, Linhares F, Puga MI, Rubio V, Pérez-Pérez J, Solano R, Leyva A,  
674 Paz-Ares J** (2010) A central regulatory system largely controls transcriptional activation  
675 and repression responses to phosphate starvation in *Arabidopsis*. *PLoS Genet* **6**: e1001102
- 676 **Castrillo G, Teixeira PJPL, Paredes SH, Law TF, de Lorenzo L, Feltcher ME, Finkel OM,  
677 Breakfield NW, Mieczkowski P, Jones CD, et al** (2017) Root microbiota drive direct  
678 integration of phosphate stress and immunity. *Nature* **543**: 513–518
- 679 **Cheng Y, Zhou W, El Sheery NI, Peters C, Li M, Wang X, Huang J** (2011) Characterization

- 680 of the Arabidopsis glycerophosphodiester phosphodiesterase (GDPD) family reveals a role  
681 of the plastid-localized AtGDPD1 in maintaining cellular phosphate homeostasis under  
682 phosphate starvation. *Plant J* **66**: 781–95
- 683 **Dietz K-J** (2015) Efficient high light acclimation involves rapid processes at multiple  
684 mechanistic levels. *J Exp Bot* **66**: 2401–14
- 685 **Dietz K-J, Heber U** (1986) Light and CO<sub>2</sub> limitation of photosynthesis and states of the  
686 reactions regenerating ribulose 1,5-bisphosphate or reducing 3-phosphoglycerate.  
687 *Biochim Biophys Acta - Bioenerg* **848**: 392–401
- 688 **Dietz K-J, Turkan I, Krieger-Liszkay A** (2016) Redox- and Reactive Oxygen Species-  
689 Dependent Signaling into and out of the Photosynthesizing Chloroplast. *Plant Physiol* **171**:  
690 1541–50
- 691 **Dietz K, Heber U** (1984) Rate-limiting factors in leaf photosynthesis. I. Carbon fluxes in the  
692 calvin cycle. *Biochim Biophys Acta - Bioenerg* **767**: 432–443
- 693 **Dietz KJ, Foyer C** (1986) The relationship between phosphate status and photosynthesis in  
694 leaves : Reversibility of the effects of phosphate deficiency on photosynthesis. *Planta* **167**:  
695 376–81
- 696 **Dong J, Ma G, Sui L, Wei M, Satheesh V, Zhang R, Ge S, Li J, Zhang T-E, Wittwer C, et**  
697 **al** (2019) Inositol Pyrophosphate InsP<sub>8</sub> Acts as an Intracellular Phosphate Signal in  
698 Arabidopsis. *Mol Plant* **12**: 1463–1473
- 699 **Fabiańska I, Bucher M, Häusler RE** (2019) Intracellular phosphate homeostasis - A short  
700 way from metabolism to signaling. *Plant Sci* **286**: 57–67
- 701 **Figuroa CM, Asencion Diez MD, Ballicora MA, Iglesias AA** (2022) Structure, function,  
702 and evolution of plant ADP-glucose pyrophosphorylase. *Plant Mol Biol* **108**: 307–323
- 703 **Frank A, Matioli CC, Viana AJC, Hearn TJ, Kusakina J, Belbin FE, Wells Newman D,**  
704 **Yochikawa A, Cano-Ramirez DL, Chembath A, et al** (2018) Circadian Entrainment in  
705 Arabidopsis by the Sugar-Responsive Transcription Factor bZIP63. *Curr Biol* **28**: 2597-  
706 2606.e6
- 707 **Hammond JP, White PJ** (2008) Sucrose transport in the phloem: integrating root responses to  
708 phosphorus starvation. *J Exp Bot* **59**: 93–109
- 709 **Hanchi M, Thibaud M-C, Légeret B, Kuwata K, Pochon N, Beisson F, Cao A, Cuyas L,**  
710 **David P, Doerner P, et al** (2018) The Phosphate Fast-Responsive Genes PECP1 and

- 711 PPsPase1 Affect Phosphocholine and Phosphoethanolamine Content. *Plant Physiol* **176**:  
712 2943–2962
- 713 **Härtel H, Dormann P, Benning C** (2000) DGD1-independent biosynthesis of extraplastidic  
714 galactolipids after phosphate deprivation in *Arabidopsis*. *Proc Natl Acad Sci U S A* **97**:  
715 10649–54
- 716 **Häusler RE, Heinrichs L, Schmitz J, Flügge UI** (2014) How sugars might coordinate  
717 chloroplast and nuclear gene expression during acclimation to high light intensities. *Mol*  
718 *Plant* **7**: 1121–1137
- 719 **Heinrichs L, Schmitz J, Flügge U-I, Häusler RE** (2012) The Mysterious Rescue of *adg1-*  
720 *1/tpt-2* - an *Arabidopsis thaliana* Double Mutant Impaired in Acclimation to High Light -  
721 by Exogenously Supplied Sugars. *Front Plant Sci* **3**: 265
- 722 **Heldt HW, Rapley L** (1970) Specific transport of inorganic phosphate, 3-phosphoglycerate  
723 and dihydroxyacetonephosphate, and of dicarboxylates across the inner membrane of  
724 spinach chloroplasts. *FEBS Lett* **10**: 143–148
- 725 **Hendriks JHM, Kolbe A, Gibon Y, Stitt M, Geigenberger P** (2003) ADP-glucose  
726 pyrophosphorylase is activated by posttranslational redox-modification in response to light  
727 and to sugars in leaves of *Arabidopsis* and other plant species. *Plant Physiol* **133**: 838–49
- 728 **Hilgers EJA, Schöttler MA, Mettler-Altmann T, Krueger S, Dörmann P, Eicks M, Flügge**  
729 **UI, Häusler RE** (2018) The combined loss of triose phosphate and xylulose 5-  
730 phosphate/phosphate translocators leads to severe growth retardation and impaired  
731 photosynthesis in *arabidopsis thaliana* *tpt/xpt* double mutants. *Front Plant Sci* **9**: 1–24
- 732 **Huang J, Zhao X, Chory J** (2019) The *Arabidopsis* Transcriptome Responds Specifically and  
733 Dynamically to High Light Stress. *Cell Rep* **29**: 4186-4199.e3
- 734 **Klecker M, Gasch P, Peisker H, Dörmann P, Schlicke H, Grimm B, Muströph A** (2014) A  
735 Shoot-Specific Hypoxic Response of *Arabidopsis* Sheds Light on the Role of the  
736 Phosphate-Responsive Transcription Factor PHOSPHATE STARVATION  
737 RESPONSE1. *Plant Physiol* **165**: 774–790
- 738 **Kobayashi K, Awai K, Takamiya K, Ohta H** (2004) *Arabidopsis* type B  
739 monogalactosyldiacylglycerol synthase genes are expressed during pollen tube growth and  
740 induced by phosphate starvation. *Plant Physiol* **134**: 640–8
- 741 **König J, Muthuramalingam M, Dietz K-J** (2012) Mechanisms and dynamics in the



- 742 thiol/disulfide redox regulatory network: transmitters, sensors and targets. *Curr Opin Plant*  
743 *Biol* **15**: 261–8
- 744 **Kumar V, Sharma A, Bhardwaj R, Thukral AK** (2019) Elemental Composition of Plants  
745 and Multivariate Analysis. *Natl Acad Sci Lett* **42**: 45–50
- 746 **Kunz HH, Häusler RE, Fettke J, Herbst K, Niewiadomski P, Gierth M, Bell K, Steup M,**  
747 **Flügge U-I, Schneider A** (2010) The role of plastidial glucose-6-phosphate/phosphate  
748 translocators in vegetative tissues of *Arabidopsis thaliana* mutants impaired in starch  
749 biosynthesis. *Plant Biol (Stuttg)* **12 Suppl 1**: 115–28
- 750 **Laisk A, Siebke K, Gerst U, Eichelmann H, Oja V, Heber U** (1991) Oscillations in  
751 photosynthesis are initiated and supported by imbalances in the supply of ATP and  
752 NADPH to the Calvin cycle. *Planta* **185**: 554–62
- 753 **Lei M, Liu Y, Zhang B, Zhao Y, Wang X, Zhou Y, Raghothama KG, Liu D** (2011) Genetic  
754 and genomic evidence that sucrose is a global regulator of plant responses to phosphate  
755 starvation in *Arabidopsis*. *Plant Physiol* **156**: 1116–30
- 756 **Li H, He K, Zhang Z, Hu Y** (2023) Molecular mechanism of phosphorous signaling inducing  
757 anthocyanin accumulation in *Arabidopsis*. *Plant Physiol Biochem* **196**: 121–129
- 758 **Lin TP, Caspar T, Somerville C, Preiss J** (1988) Isolation and Characterization of a  
759 Starchless Mutant of *Arabidopsis thaliana* (L.) Heynh Lacking ADPglucose  
760 Pyrophosphorylase Activity. *Plant Physiol* **86**: 1131–5
- 761 **Liu Y, Xie Y, Wang H, Ma X, Yao W, Wang H** (2017) Light and ethylene coordinately  
762 regulate the phosphate starvation response through transcriptional regulation of  
763 PHOSPHATE STARVATION RESPONSE1. *Plant Cell* **29**: 2269–2284
- 764 **Liu Z, Wu X, Wang E, Liu Y, Wang Y, Zheng Q, Han Y, Chen Z, Zhang Y** (2022) PHR1  
765 positively regulates phosphate starvation-induced anthocyanin accumulation through  
766 direct upregulation of genes F3'H and LDOX in *Arabidopsis*. *Planta* **256**: 42
- 767 **MacNeill GJ, Mehrpouyan S, Minow MAA, Patterson JA, Tetlow IJ, Emes MJ** (2017)  
768 Starch as a source, starch as a sink: the bifunctional role of starch in carbon allocation. *J*  
769 *Exp Bot* **68**: 4433–4453
- 770 **Matiolli CC, Soares RC, Alves HLS, Abreu IA** (2022) Turning the Knobs: The Impact of  
771 Post-translational Modifications on Carbon Metabolism. *Front Plant Sci* **12**: 781508
- 772 **Matiolli CC, Tomaz JP, Duarte GT, Prado FM, Del Bem LEV, Silveira AB, Gauer L,**

- 773 **Corrêa LGG, Drumond RD, Viana AJC, et al** (2011) The Arabidopsis bZIP gene  
774 AtbZIP63 is a sensitive integrator of transient abscisic acid and glucose signals. *Plant*  
775 *Physiol* **157**: 692–705
- 776 **Matsoukas IG, Massiah AJ, Thomas B** (2013) Starch metabolism and antiflorigenic signals  
777 modulate the juvenile-to-adult phase transition in Arabidopsis. *Plant Cell Environ* **36**:  
778 1802–11
- 779 **Maxwell K, Johnson GN** (2000) Chlorophyll fluorescence--a practical guide. *J Exp Bot* **51**:  
780 659–68
- 781 **Misson J, Raghothama KG, Jain A, Jouhet J, Block MA, Bligny R, Ortet P, Creff A,**  
782 **Somerville S, Rolland N, et al** (2005) A genome-wide transcriptional analysis using  
783 Arabidopsis thaliana Affymetrix gene chips determined plant responses to phosphate  
784 deprivation. *Proc Natl Acad Sci U S A* **102**: 11934–9
- 785 **Moore M, Vogel MO, Dietz KJ** (2014) The acclimation response to high light is initiated  
786 within seconds as indicated by upregulation of AP2/ERF transcription factor network in  
787 Arabidopsis thaliana. *Plant Signal Behav* **9**: 1–4
- 788 **Morcuende R, Bari R, Gibon Y, Zheng W, Pant BD, Bläsing O, Usadel B, Czechowski T,**  
789 **Udvardi MK, Stitt M, et al** (2007) Genome-wide reprogramming of metabolism and  
790 regulatory networks of Arabidopsis in response to phosphorus. *Plant Cell Environ* **30**: 85–  
791 112
- 792 **Mustroph A, Boamfa EI, Laarhoven LJJ, Harren FJM, Albrecht G, Grimm B** (2006)  
793 Organ-specific analysis of the anaerobic primary metabolism in rice and wheat seedlings.  
794 I: Dark ethanol production is dominated by the shoots. *Planta* **225**: 103–14
- 795 **Nam H-I, Shahzad Z, Dorone Y, Clowez S, Zhao K, Bouain N, Lay-Pruitt KS, Cho H,**  
796 **Rhee SY, Rouached H** (2021) Interdependent iron and phosphorus availability controls  
797 photosynthesis through retrograde signaling. *Nat Commun* **12**: 7211
- 798 **Niewiadomski P, Knappe S, Geimer S, Fischer K, Schulz B, Unte US, Rosso MG, Ache P,**  
799 **Flügge UI, Schneider A** (2005) The Arabidopsis plastidic glucose 6-phosphate/phosphate  
800 translocator GPT1 is essential for pollen maturation and embryo sac development. *Plant*  
801 *Cell* **17**: 760–775
- 802 **Nilsson L, Lundmark M, Jensen PE, Nielsen TH** (2012) The Arabidopsis transcription factor  
803 PHR1 is essential for adaptation to high light and retaining functional photosynthesis  
804 during phosphate starvation. *Physiol Plant* **144**: 35–47

- 805 **Nilsson L, Müller R, Nielsen TH** (2007) Increased expression of the MYB-related  
806 transcription factor, PHR1, leads to enhanced phosphate uptake in *Arabidopsis thaliana*.  
807 *Plant Cell Environ* **30**: 1499–512
- 808 **Ohnishi M, Anegawa A, Sugiyama Y, Harada K, Oikawa A, Nakayama Y, Matsuda F,**  
809 **Nakamura Y, Sasaki R, Shichijo C, et al** (2018) Molecular Components of *Arabidopsis*  
810 Intact Vacuoles Clarified with Metabolomic and Proteomic Analyses. *Plant Cell Physiol*  
811 **59**: 1353–1362
- 812 **Osorio MB, Ng S, Berkowitz O, De Clercq I, Mao C, Shou H, Whelan J, Jost R** (2019)  
813 SPX4 Acts on PHR1-Dependent and -Independent Regulation of Shoot Phosphorus Status  
814 in *Arabidopsis*. *Plant Physiol* **181**: 332–352
- 815 **Pant B-D, Pant P, Erban A, Huhman D, Kopka J, Scheible W-R** (2015a) Identification of  
816 primary and secondary metabolites with phosphorus status-dependent abundance in  
817 *Arabidopsis*, and of the transcription factor PHR1 as a major regulator of metabolic  
818 changes during phosphorus limitation. *Plant Cell Environ* **38**: 172–87
- 819 **Pant BD, Burgos A, Pant P, Cuadros-Inostroza A, Willmitzer L, Scheible WR** (2015b) The  
820 transcription factor PHR1 regulates lipid remodeling and triacylglycerol accumulation in  
821 *Arabidopsis thaliana* during phosphorus starvation. *J Exp Bot* **66**: 1907–1918
- 822 **Paz-Ares J, Puga MI, Rojas-Triana M, Martinez-Hevia I, Diaz S, Poza-Carrión C,**  
823 **Miñambres M, Leyva A** (2022) Plant adaptation to low phosphorus availability: Core  
824 signaling, crosstalks, and applied implications. *Mol Plant* **15**: 104–124
- 825 **Preiss J** (1984) Starch, sucrose biosynthesis and partition of carbon in plants are regulated by  
826 orthophosphate and triose-phosphates. *Trends Biochem Sci* **9**: 24–27
- 827 **Preiss J** (1988) Biosynthesis of starch and its regulation. *In* J Preiss, ed, *Biochem. Plants*, 14th  
828 ed. Academic Press, San Diego, pp 181–254
- 829 **Puga MI, Mateos I, Charukesi R, Wang Z, Franco-Zorrilla JM, de Lorenzo L, Irigoyen**  
830 **ML, Masiero S, Bustos R, Rodríguez J, et al** (2014) SPX1 is a phosphate-dependent  
831 inhibitor of Phosphate Starvation Response 1 in *Arabidopsis*. *Proc Natl Acad Sci U S A*  
832 **111**: 14947–52
- 833 **Ramaiah M, Jain A, Baldwin JC, Karthikeyan AS, Raghothama KG** (2011)  
834 Characterization of the phosphate starvation-induced glycerol-3-phosphate permease gene  
835 family in *Arabidopsis*. *Plant Physiol* **157**: 279–91

- 836 **Rawat R, Schwartz J, Jones MA, Sairanen I, Cheng Y, Andersson CR, Zhao Y, Ljung K,**  
837 **Harmer SL** (2009) REVEILLE1, a Myb-like transcription factor, integrates the circadian  
838 clock and auxin pathways. *Proc Natl Acad Sci U S A* **106**: 16883–8
- 839 **Ried MK, Wild R, Zhu J, Pipercevic J, Sturm K, Broger L, Harmel RK, Abriata LA,**  
840 **Hothorn LA, Fiedler D, et al** (2021) Inositol pyrophosphates promote the interaction of  
841 SPX domains with the coiled-coil motif of PHR transcription factors to regulate plant  
842 phosphate homeostasis. *Nat Commun* **12**: 384
- 843 **Riemer E, Qiu D, Laha D, Harmel RK, Gaugler P, Gaugler V, Frei M, Hajirezaei M-R,**  
844 **Laha NP, Krusenbaum L, et al** (2021) ITPK1 is an InsP6/ADP phosphotransferase that  
845 controls phosphate signaling in Arabidopsis. *Mol Plant* **14**: 1864–1880
- 846 **Robinson S, Giersch C** (1987) Inorganic Phosphate Concentration in the Stroma of Isolated  
847 Chloroplasts and Its Influence on Photosynthesis. *Aust J Plant Physiol* **14**: 451
- 848 **van Rooijen R, Harbinson J, Aarts MGM** (2018) Photosynthetic response to increased  
849 irradiance correlates to variation in transcriptional response of lipid-remodeling and heat-  
850 shock genes. *Plant direct* **2**: e00069
- 851 **Rubio V, Linhares F, Solano R, Martín AC, Iglesias J, Leyva A, Paz-Ares J** (2001) A  
852 conserved MYB transcription factor involved in phosphate starvation signaling both in  
853 vascular plants and in unicellular algae. *Genes Dev* **15**: 2122–33
- 854 **Sakuraba Y, Kanno S, Mabuchi A, Monda K, Iba K, Yanagisawa S** (2018) A phytochrome-  
855 B-mediated regulatory mechanism of phosphorus acquisition. *Nat plants* **4**: 1089–1101
- 856 **Scheible W-R, Pant P, Pant BD, Krom N, Allen RD, Mysore KS** (2023) Elucidating the  
857 unknown transcriptional responses and PHR1 mediated biotic and abiotic stress tolerance  
858 during phosphorus-limitation. *J Exp Bot* **11**: erad009
- 859 **Schmitz J, Schöttler MA, Krueger S, Geimer S, Schneider A, Kleine T, Leister D, Bell K,**  
860 **Flügge U-I, Häusler RE** (2012) Defects in leaf carbohydrate metabolism compromise  
861 acclimation to high light and lead to a high chlorophyll fluorescence phenotype in  
862 *Arabidopsis thaliana*. *BMC Plant Biol* **12**: 8
- 863 **Schneider A, Häusler RE, Kolukisaoglu Ü, Kunze R, Van der Graaff E, Schwacke R,**  
864 **Catoni E, Desimone M, Flügge UI** (2002) An *Arabidopsis thaliana* knock-out mutant of  
865 the chloroplast triose phosphate/phosphate translocator is severely compromised only  
866 when starch synthesis, but not starch mobilisation is abolished. *Plant J* **32**: 685–699

- 867 **Schreiber U, Schliwa U, Bilger W** (1986) Continuous recording of photochemical and non-  
868 photochemical chlorophyll fluorescence quenching with a new type of modulation  
869 fluorometer. *Photosynth Res* **10**: 51–62
- 870 **Sivak MN, Walker DA** (1986) Photosynthesis in vivo can be limited by phosphate supply.  
871 *New Phytol* **102**: 499–512
- 872 **Smith AM, Stitt M** (2007) Coordination of carbon supply and plant growth. *Plant Cell Environ*  
873 **30**: 1126–49
- 874 **Stitt M, Grosse H** (1988) Interactions between Sucrose Synthesis and CO<sub>2</sub> Fixation IV.  
875 Temperature-dependent adjustment of the relation between sucrose synthesis and CO<sub>2</sub>  
876 fixation. *J Plant Physiol* **133**: 392–400
- 877 **Stitt M, Wirtz W, Heldt HW** (1980) Metabolite levels during induction in the chloroplast and  
878 extrachloroplast compartments of spinach protoplasts. *Biochim Biophys Acta* **593**: 85–  
879 102
- 880 **Stitt M, Wirtz W, Heldt HW** (1983) Regulation of Sucrose Synthesis by Cytoplasmic  
881 Fructosebiphosphatase and Sucrose Phosphate Synthase during Photosynthesis in  
882 Varying Light and Carbon Dioxide. *Plant Physiol* **72**: 767–74
- 883 **Sun L, Song L, Zhang Y, Zheng Z, Liu D** (2016) Arabidopsis PHL2 and PHR1 Act  
884 Redundantly as the Key Components of the Central Regulatory System Controlling  
885 Transcriptional Responses to Phosphate Starvation. *Plant Physiol* **170**: 499–514
- 886 **Suzuki N, Devireddy AR, Inupakutika MA, Baxter A, Miller G, Song L, Shulaev E, Azad**  
887 **RK, Shulaev V, Mittler R** (2015) Ultra-fast alterations in mRNA levels uncover multiple  
888 players in light stress acclimation in plants. *Plant J* **84**: 760–72
- 889 **Thibaud M-C, Arrighi J-F, Bayle V, Chiarenza S, Creff A, Bustos R, Paz-Ares J, Poirier**  
890 **Y, Nussaume L** (2010) Dissection of local and systemic transcriptional responses to  
891 phosphate starvation in Arabidopsis. *Plant J* **64**: 775–89
- 892 **Vandenbussche F, Habricot Y, Condif AS, Maldiney R, Van Der Straeten D, Ahmad M**  
893 (2007) HY5 is a point of convergence between cryptochrome and cytokinin signalling  
894 pathways in Arabidopsis thaliana. *Plant J* **49**: 428–441
- 895 **Vogel MO, Moore M, König K, Pecher P, Alsharafa K, Lee J, Dietz KJ** (2014) Fast  
896 retrograde signaling in response to high light involves metabolite export, MITOGEN-  
897 ACTIVATED PROTEIN KINASE6, and AP2/ERF transcription factors in Arabidopsis.

- 898 Plant Cell **26**: 1151–1165
- 899 **Wahl V, Ponnu J, Schlereth A, Arrivault S, Langenecker T, Franke A, Feil R, Lunn JE,**  
900 **Stitt M, Schmid M** (2013) Regulation of flowering by trehalose-6-phosphate signaling in  
901 *Arabidopsis thaliana*. *Science* **339**: 704–7
- 902 **Wang Z, Zheng Z, Song L, Liu D** (2018a) Functional Characterization of *Arabidopsis* PHL4  
903 in Plant Response to Phosphate Starvation. *Front Plant Sci* **9**: 1432
- 904 **Wang ZQ, Zhou X, Dong L, Guo J, Chen Y, Zhang Y, Wu L, Xu M** (2018b) iTRAQ-based  
905 analysis of the *Arabidopsis* proteome reveals insights into the potential mechanisms of  
906 anthocyanin accumulation regulation in response to phosphate deficiency. *J Proteomics*  
907 **184**: 39–53
- 908 **Ward JT, Lahner B, Yakubova E, Salt DE, Raghothama KG** (2008) The effect of iron on  
909 the primary root elongation of *Arabidopsis* during phosphate deficiency. *Plant Physiol*  
910 **147**: 1181–91
- 911 **Weise SE, Liu T, Childs KL, Preiser AL, Katulski HM, Perrin-Porzondek C, Sharkey TD**  
912 (2019) Transcriptional Regulation of the Glucose-6-Phosphate/Phosphate Translocator 2  
913 Is Related to Carbon Exchange Across the Chloroplast Envelope. *Front Plant Sci* **10**: 827
- 914 **Woodrow IE, Raymond Ellis J, Jellings A, Foyer CH** (1984) Compartmentation and fluxes  
915 of inorganic phosphate in photosynthetic cells. *Planta* **161**: 525–30
- 916 **Wu FH, Shen SC, Lee LY, Lee SH, Chan MT, Lin CS** (2009) Tape-*arabidopsis* sandwich -  
917 A simpler *arabidopsis* protoplast isolation method. *Plant Methods* **5**: 1–10
- 918 **Xu L, Zhao H, Wan R, Liu Y, Xu Z, Tian W, Ruan W, Wang F, Deng M, Wang J, et al**  
919 (2019) Identification of vacuolar phosphate efflux transporters in land plants. *Nat plants*  
920 **5**: 84–94
- 921 **Yu L, Fan J, Zhou C, Xu C** (2021) Chloroplast lipid biosynthesis is fine-tuned to thylakoid  
922 membrane remodeling during light acclimation. *Plant Physiol* **185**: 94–107
- 923 **Zhou J, Jiao F, Wu Z, Li Y, Wang X, He X, Zhong W, Wu P** (2008) OsPHR2 is involved in  
924 phosphate-starvation signaling and excessive phosphate accumulation in shoots of plants.  
925 *Plant Physiol* **146**: 1673–86
- 926 **Zhu J, Lau K, Puschmann R, Harmel RK, Zhang Y, Pries V, Gaugler P, Broger L, Dutta**  
927 **AK, Jessen HJ, et al** (2019) Two bifunctional inositol pyrophosphate  
928 kinases/phosphatases control plant phosphate homeostasis. *Elife* **8**: 1–25

929 **Zirngibl M-E, Araguirang GE, Kitashova A, Jahnke K, Rolka T, Kühn C, Nägele T,**  
930 **Richter AS** (2023) Triose phosphate export from chloroplasts and cellular sugar content  
931 regulate anthocyanin biosynthesis during high light acclimation. *Plant Commun* **4**: 100423  
932  
933

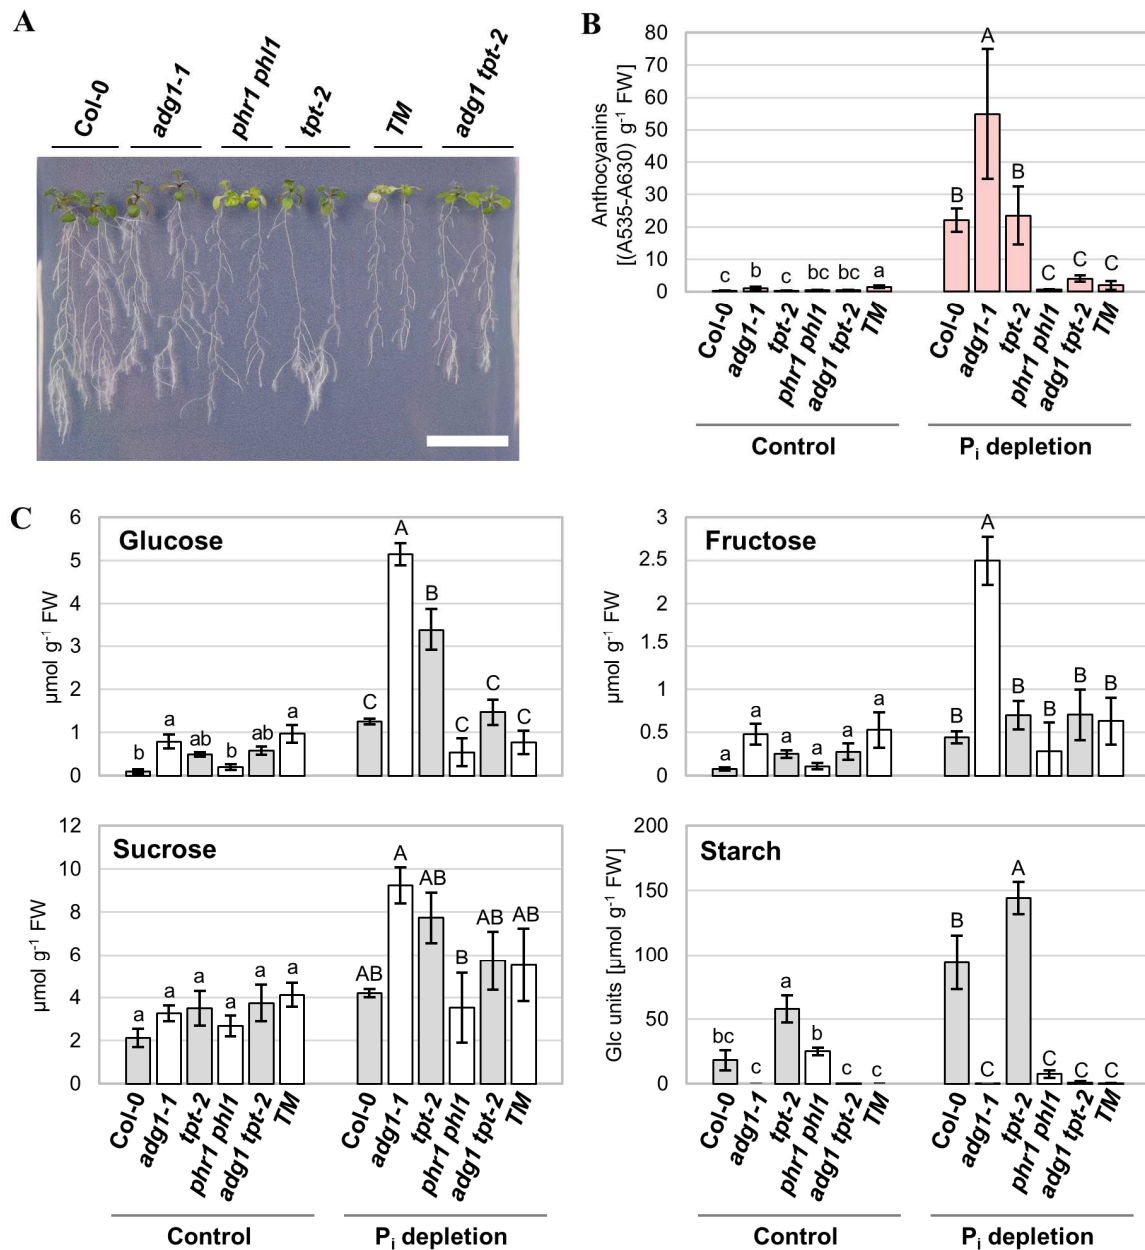

934

935 **Figure 1** P<sub>i</sub> starvation responses are affected by photoassimilate partitioning. **A-C**, Seedlings  
 936 of wildtype (Col-0), *adg1-1*, *tpt-2*, *phr1-3 phl1*, *adg1 tpt-2* and *adg1 phr1-3 phl1* (TM)  
 937 genotype were grown for 7 (A), 5 (B), or 10 (C) days on rich medium including 0.5 % sucrose  
 938 before transfer to media with 0.5 % sucrose and either 2.5 mM (Control) or 0 mM (P<sub>i</sub>  
 939 depletion) KH<sub>2</sub>PO<sub>4</sub> added. Growth was continued for 8 (A), or 7 (B, C) days. **A**, Seedling  
 940 phenotypes under P<sub>i</sub> deficient growth conditions. Bar, 2 cm. **B**, Anthocyanin contents of  
 941 seedling shoots. Pigment levels are depicted as units of absorbance (A535 - A630) relative to  
 942 shoot fresh weights. Bars represent means ± standard deviations; *n* = 5-6 pools of seedling  
 943 shoots from 3 independent experiments; **C**, Contents of glucose, fructose, sucrose and starch.  
 944 Pools of seedling shoots were harvested 10.25 hours after onset of the 16-hours photoperiod.



945 Means  $\pm$  standard deviations;  $n = 3$  independent experiments. **B, C**, Statistical analyses were  
946 performed with One-way ANOVA with Tukey HSD follow-up test and Bonferroni alpha  
947 correction for contrasts;  $P < 0.05$ .

948

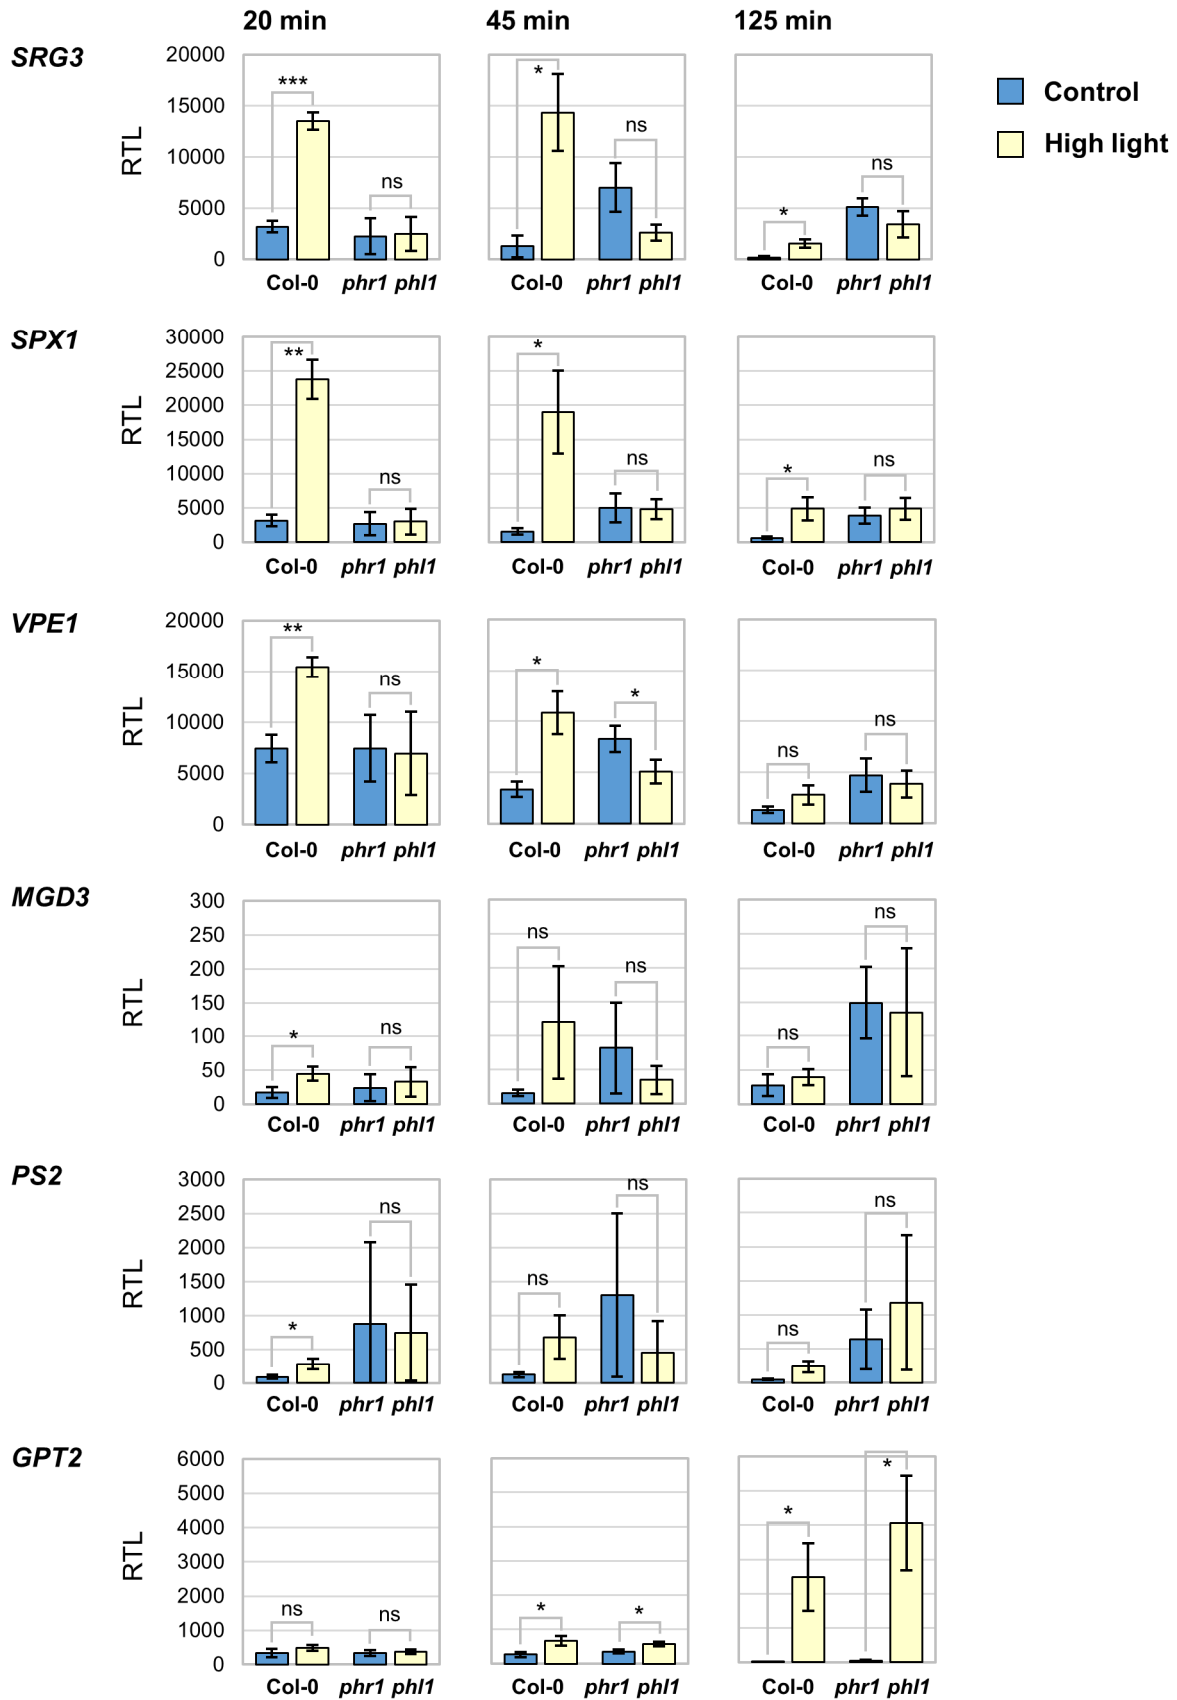

949

950 **Figure 2** PHR1-target genes are rapidly induced by high light. qRT-PCR analyses of indicated  
 951 transcripts in rosette leaves from wildtype (Col-0) and *phr1-1 phl1* mutants. Plants were grown  
 952 on soil for 5 weeks in an 8-hours light regime at  $80 \pm 5 \mu\text{mol m}^{-2} \text{s}^{-1}$  before light intensity was

953 set to  $320 \pm 30 \mu\text{mol m}^{-2} \text{s}^{-1}$  (High light, yellow bars) starting 1 hour after onset of the  
954 photoperiod on day 36. The control group was kept at  $80 \pm 5 \mu\text{mol m}^{-2} \text{s}^{-1}$  (blue bars). Per sample,  
955 2-3 fully developed leaves (leaves no. 10-13) were harvested at the indicated treatment times.  
956 Transcript levels were calculated relative to *PP2A* as  $1000 \cdot 2^{-\Delta\text{CT}}$ . Bars represent means  
957  $\pm$  standard deviations,  $n = 3$  independent experiments. Statistical analyses were performed  
958 using Student's *t* test with 2-tailed distribution, unpaired with unequal variance. Significant  
959 differences are indicated as \*\*\* $P < 0.001$ , \*\* $P < 0.01$ , \* $P < 0.05$ , ns, not significant.

960

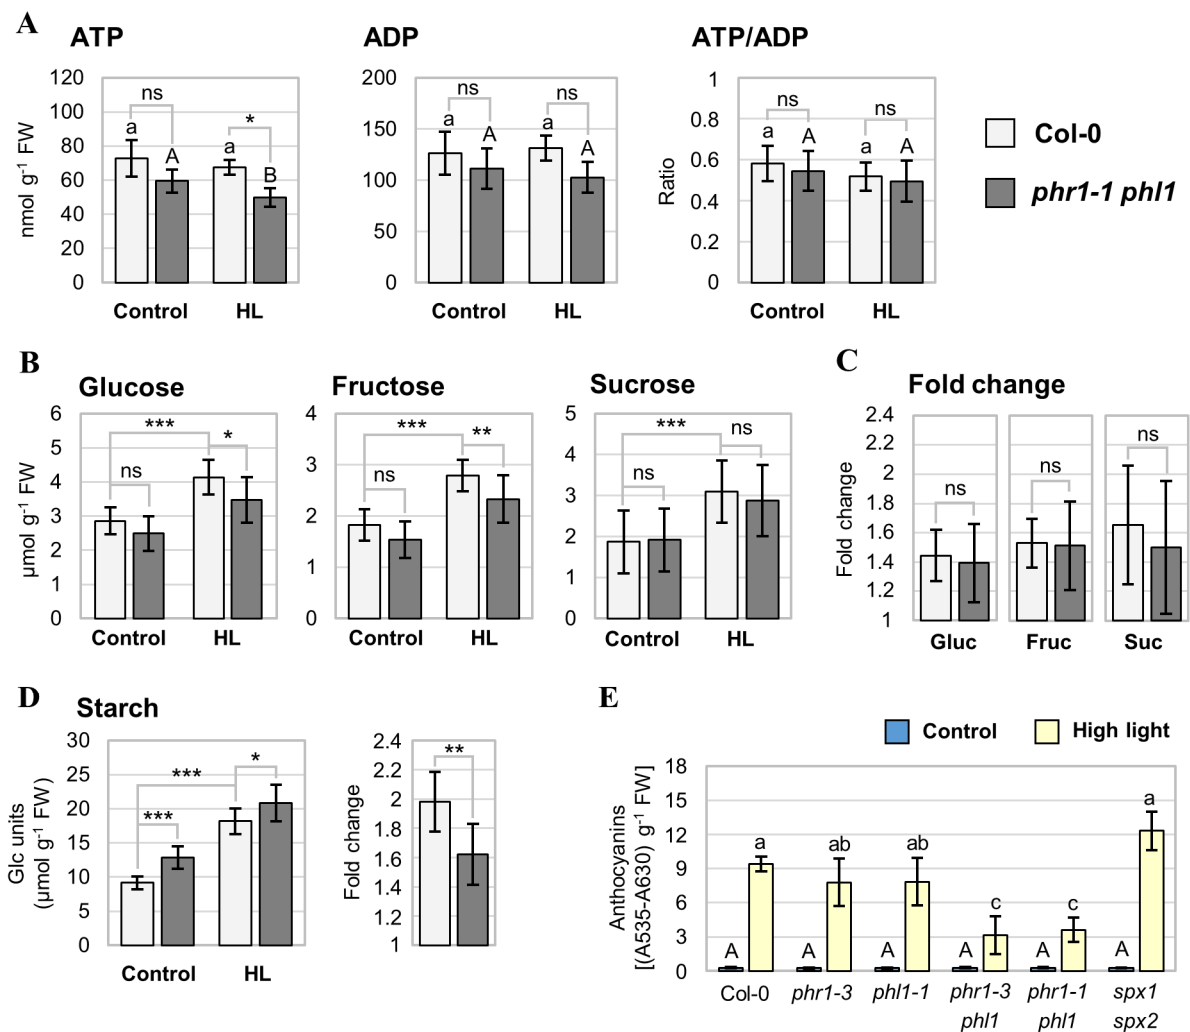

961

962 **Figure 3** High-light induced metabolic changes in *phr1-1 phl1*. **A-D**, Levels of the indicated  
 963 metabolites in leaves of wildtype (Col-0, light grey bars) and *phr1-1 phl1* mutants (dark grey  
 964 bars) are depicted. Plants were grown and treated as described in Figure 2. Fully expanded  
 965 leaves were sampled after 90 min of exposure to a photon flux density of either  
 966  $80 \pm 5 \mu\text{mol m}^{-2} \text{s}^{-1}$  (**Control**) or  $320 \pm 30 \mu\text{mol m}^{-2} \text{s}^{-1}$  (**HL**). Bars show means  $\pm$  standard  
 967 deviations; statistical analyses were performed with Student's *t* test with two-tailed distribution,  
 968 unpaired with unequal variance. Significant differences are indicated as \*\*\*  $P < 0.001$ , \*\*  $P$   
 969  $< 0.01$ , \*  $P < 0.05$ , ns not significant. **A**,  $n = 6$  plants from 3 independent experiments; significant  
 970 differences indicated by letter code:  $P < 0.05$ . **B**, **C**,  $n = 11-12$  plants from 4 independent  
 971 experiments. **C**, **D**, Fold changes of sugar/starch contents were calculated for each genotype as  
 972 HL/mean of control. **Gluc** glucose; **Fruc** fructose; **Suc** sucrose. **D**,  $n = 9$  plants from 3  
 973 independent experiments. **E**, Anthocyanin levels determined in leaves of the indicated  
 974 genotypes after 3 days of high-light exposure. Plants were grown for 32 days under low light  
 975 conditions ( $70 \pm 10 \mu\text{mol m}^{-2} \text{s}^{-1}$ ) in an 8-hours light regime. Subsequently, light intensity was  
 976 increased for the treatment group (High light, yellow bars) to  $450 \pm 30 \mu\text{mol m}^{-2} \text{s}^{-1}$ , while the

977 control group (blue bars) was kept under growth light conditions. Leaf material was harvested  
978 after additional 70 hours. Pigment contents are expressed as absorbance units (A535 - A630)  
979 relative to shoot fresh weight.  $n = 3$  independent experiments; statistical analyses were  
980 conducted using One-way ANOVA with Tukey HSD follow-up test and Bonferroni alpha  
981 correction for contrasts,  $P < 0.01$ ; ns, not significant.

982

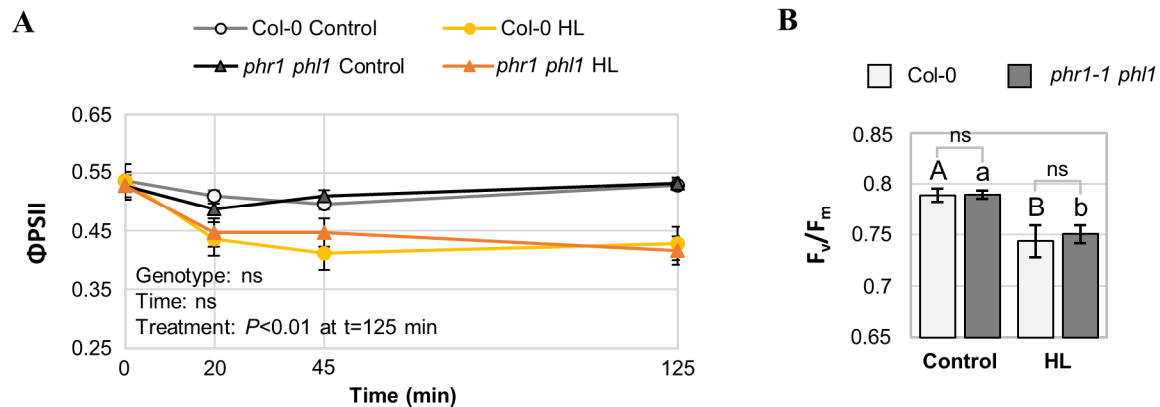

983

984 **Figure 4** Effect of high light on chlorophyll fluorescence in the *phr1-1 phl1* mutant. Plants of  
985 wildtype (Col-0) and *phr1-1 phl1* genotype were grown as described in Figure 2. After 5 weeks  
986 of growth, the light intensity was increased to  $320 \pm 30 \mu\text{mol m}^{-2} \text{s}^{-1}$  for high-light (HL)  
987 treatments, whereas the control group was kept under growth light conditions  
988 ( $80 \pm 5 \mu\text{mol m}^{-2} \text{s}^{-1}$ ).  $n = 3$  independent experiments (representing means of each 3 leaves  
989 measured). Significance was tested using One-way ANOVA with Tukey HSD follow-up test  
990 and Bonferroni alpha correction for contrasts; ns, not significant. **A**, PAM measurements were  
991 performed to determine the quantum yield of photosystem II photochemistry ( $\Phi_{PSII}$ ) on light-  
992 adapted leaves after 20, 45, and 125 min of treatment. **B**, Plants subjected to high-light stress  
993 were dark-adapted for 20 min after 125 min of stress duration to determine the maximum  
994 efficiency of photosystem II ( $F_v/F_m$ ). Bars show means  $\pm$  standard deviations;  $P < 0.01$ .

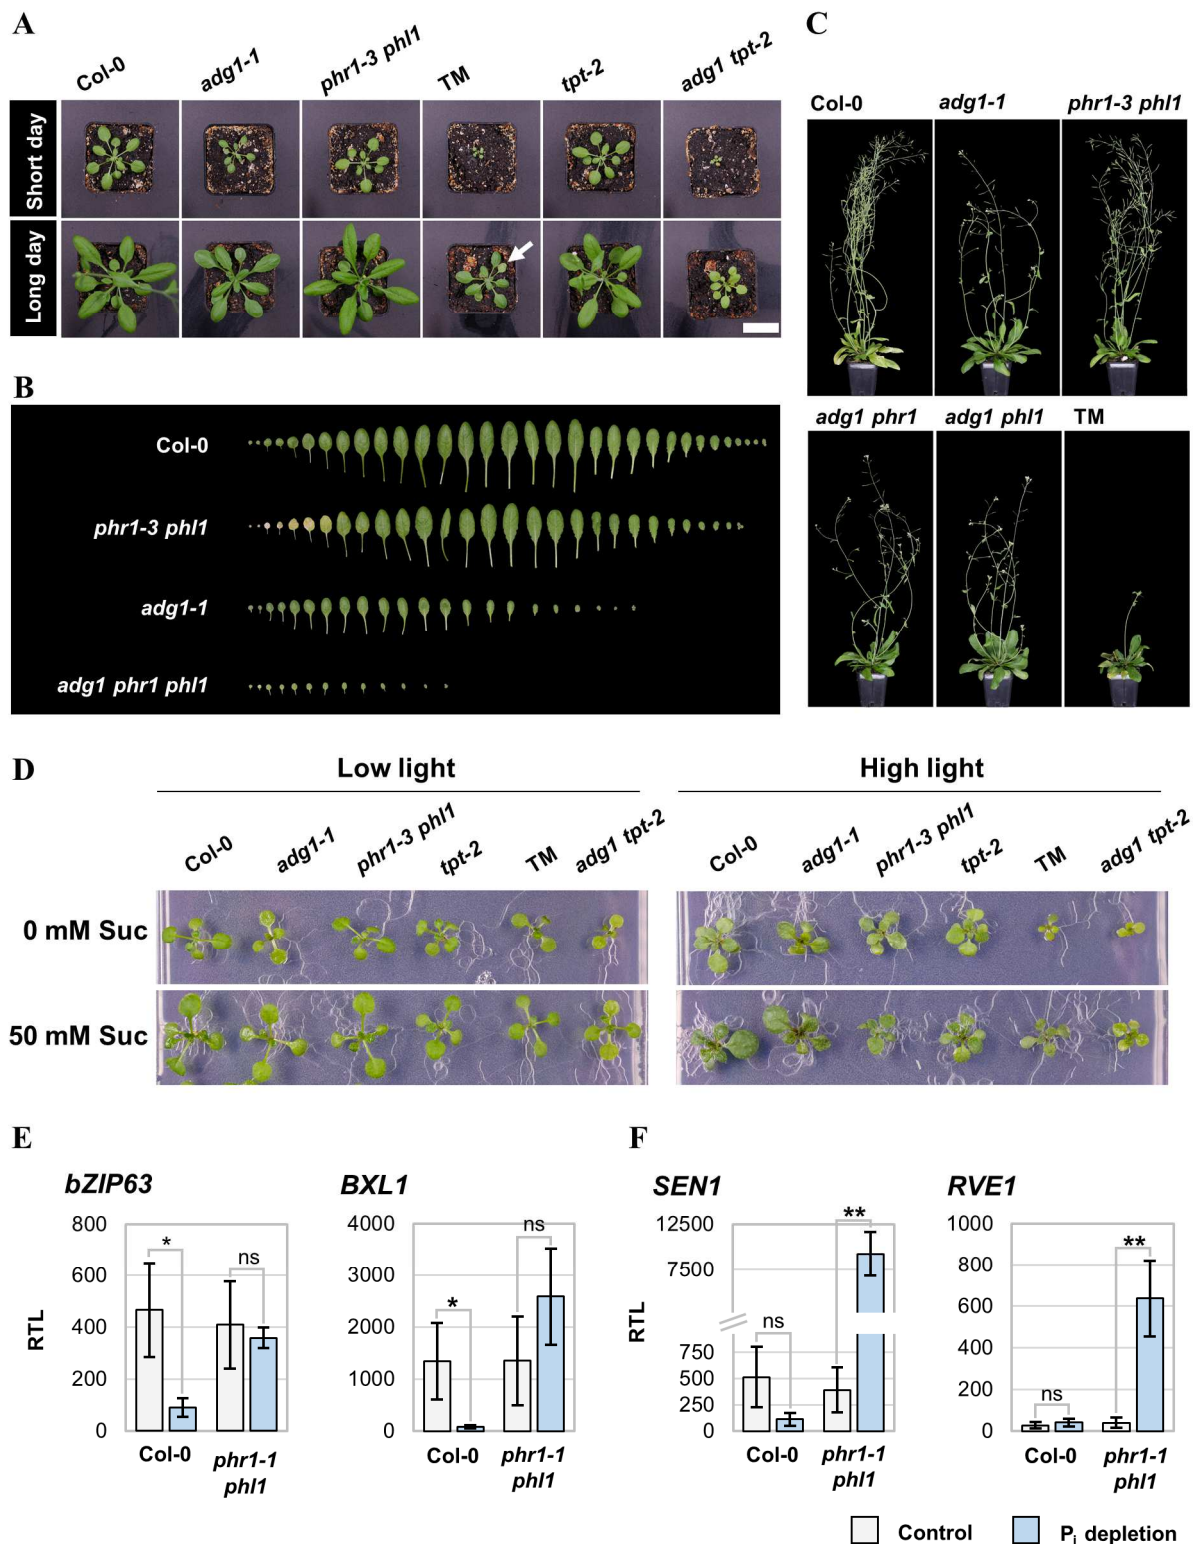

995

996 **Figure 5** Carbohydrate metabolism is affected by *phr1 phl1* mutation. **A-D**, Phenotypes of the  
 997 *adg1 phr1 phl1* triple mutant (TM). **A-C**, Plants were grown at 23°C and a light intensity of  
 998  $100 \pm 10 \mu\text{mol m}^{-2} \text{s}^{-1}$ . **A**, Rosette habitus of plants grown under short-day (8 hours light period)  
 999 and long-day (16 h light period) conditions. Pictures were taken of representative plants after  
 1000 27 (short day) and 25 (long day) days of growth. The arrow indicates a senescent leaf. Bar,

1001 2.5 cm. **B**, Leaves of 42 day-old plants grown under an 8-hours light regime were aligned  
1002 according to age (starting with the cotyledons on the left hand side). **C**, Inflorescences of  
1003 wildtype (Col-0), *adg1-1*, *phr1-3 phl1*, and derived genotypes showing delay of the transition  
1004 to flowering in the TM. Pictures were taken of representative plants after 42 days of growth  
1005 under a 16-hours light regiment. **B**, **C**, Backgrounds were manually removed for better  
1006 visualization. **D**, High-light sensitivity of TM and growth promotion by exogenous sucrose.  
1007 Seedlings were grown in long-day conditions under low light ( $50\pm5 \mu\text{mol m}^{-2} \text{s}^{-1}$ ) or high light  
1008 ( $320\pm30 \mu\text{mol m}^{-2} \text{s}^{-1}$ ) on rich media with or without sucrose added. Media-containing square  
1009 petri dishes were positioned horizontally. Pictures were taken after 14 days of growth. **E**, **F**,  
1010 Carbohydrate responsive gene expression is affected under  $P_i$  starvation. qRT-PCR analysis of  
1011 carbohydrate-responsive transcripts which are downregulated in shoots of the wildtype (**E**), or  
1012 upregulated in shoots of *phr1-1 phl1* mutant seedlings (**F**) grown for 7 days on rich medium  
1013 containing 0.5 % sucrose, and for additional 8 days on media with 0.5 % sucrose and either  
1014 2.5 mM (control, light grey bars), or 0 mM ( $P_i$  depletion, blue bars)  $\text{KH}_2\text{PO}_4$  added. Transcript  
1015 levels were calculated relative to the level of *PP2A* transcript as  $1000 \cdot 2^{-\Delta\text{CT}}$ . Bars represent  
1016 means  $\pm$  standard deviations;  $n = 3$  independent experiments. One-way ANOVA with Tukey  
1017 HSD follow-up test and Bonferroni alpha correction for contrasts; \*\*  $P < 0.01$ , \*  $P < 0.05$ , ns,  
1018 no significant difference.



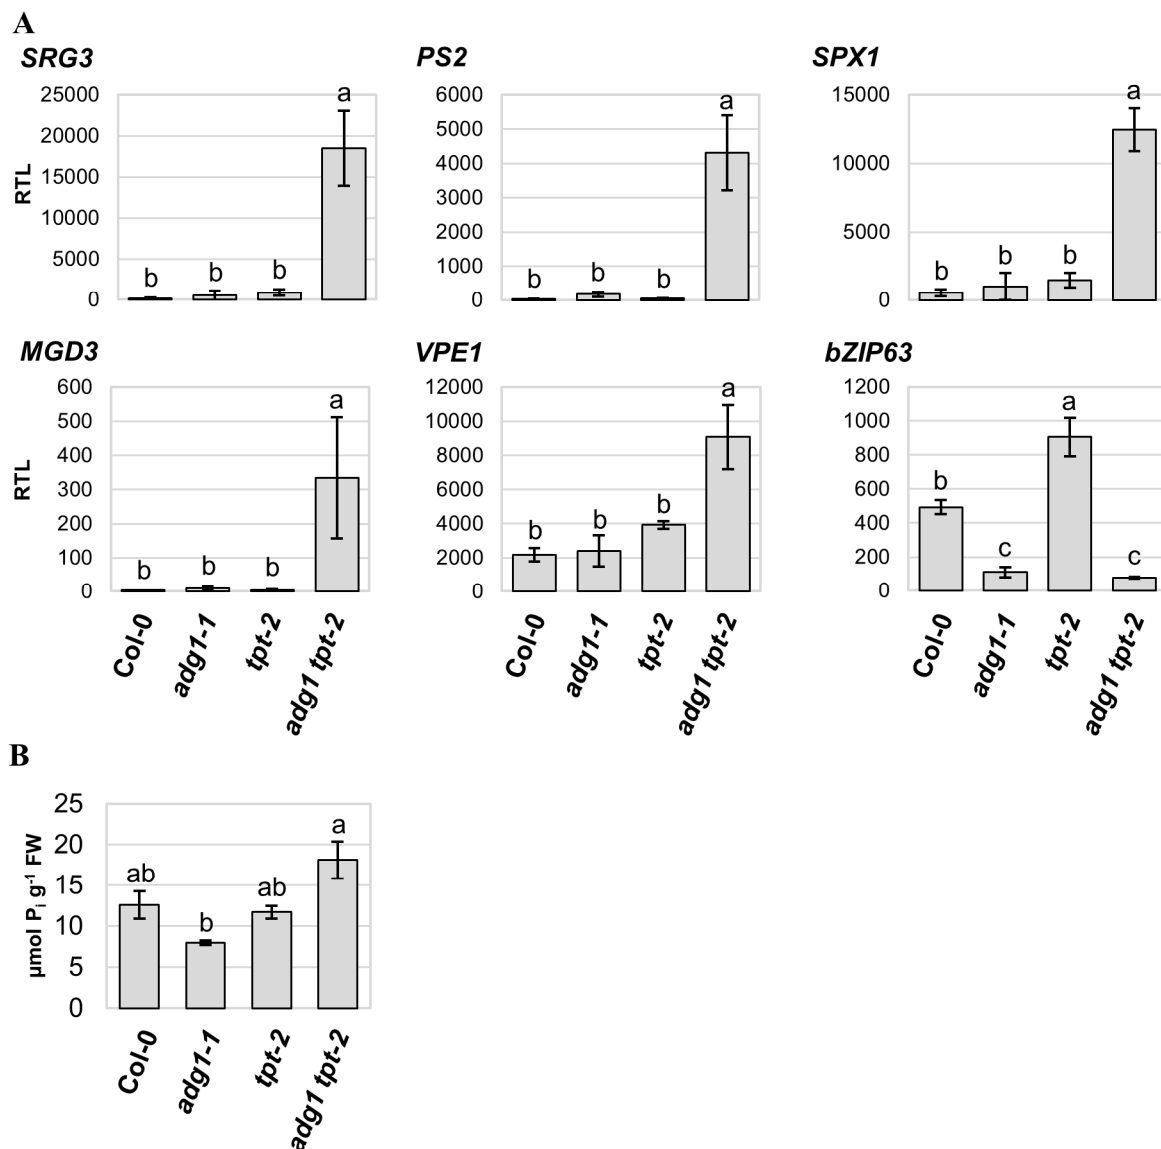

1019

1020 **Figure 6** Constitutive  $\text{P}_i$  starvation transcription in rosette leaves of *adg1 tpt-2*. **A**, **B**, Plants  
 1021 were grown on soil at a photon flux density of  $90 \pm 10 \mu\text{mol m}^{-2} \text{s}^{-1}$  and sampled 135 min after  
 1022 onset of the 8-hours photoperiod after 5 weeks of growth. **A**, qRT-PCR analysis of the transcript  
 1023 levels of  $\text{P}_i$  starvation marker genes in rosette leaves of wildtype (Col-0), *adg1-1*, *tpt-2*, and  
 1024 *adg1 tpt-2*. Transcript levels are  $1000 \cdot 2^{-\Delta\text{CT}}$  relative to *PP2A*. Bars show means  $\pm$  standard  
 1025 deviations.  $n = 3$  independent experiments. One-way ANOVA with Tukey HSD follow-up test  
 1026 and Bonferroni alpha correction for contrasts;  $P < 0.01$ . **B**,  $\text{P}_i$  contents of rosette leaves. Means  
 1027  $\pm$  standard deviations are depicted.  $n = 3$  independent experiments. Kruskal-Wallis test with  
 1028 DUNN's follow-up test and DUNN/Sidak alpha correction for contrasts;  $P < 0.01$ .

1029

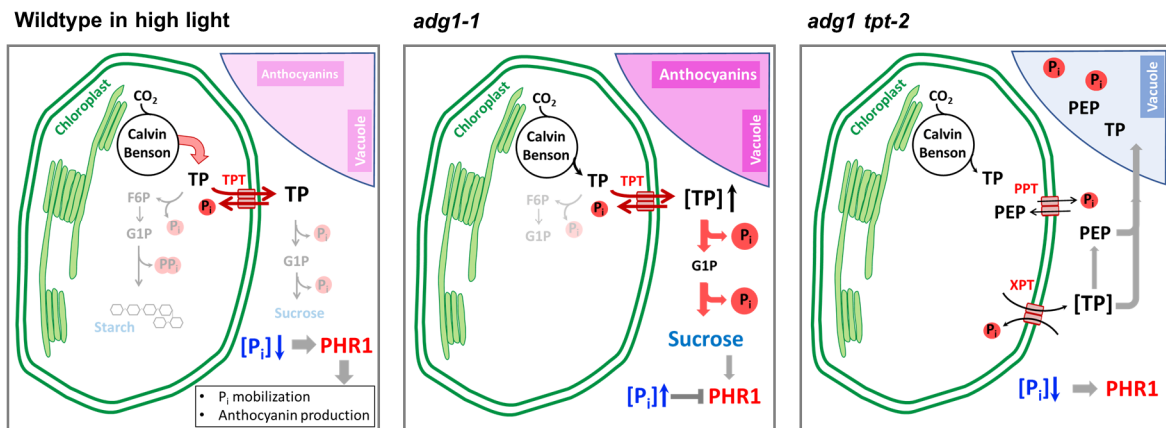

1030

1031 **Figure 7** Model for PHR1 activation during imbalances in triose phosphate production and  
 1032 consumption. In wildtype mesophyll cells subjected to an increase in light intensity (left panel),  
 1033 triose phosphate (TP) production by the Calvin-Benson-Bassham cycle transiently exceeds the  
 1034 rates of TP utilization by starch and sucrose biosynthesis causing sequestration of free  $P_i$ .  
 1035 Increased export of TPs to the cytosol via the TPT leads to a decrease in  $P_i$  concentration in the  
 1036 cytosol which results in PHR1 activation. High PHR1 activity facilitates the mobilization of  $P_i$   
 1037 from internal sources including the stimulation of starch accumulation, and, together with a  
 1038 signal derived from TPs or 3-phosphoglycerate (3-PGA) accumulation, PHR1 triggers  
 1039 anthocyanin production. In the *adg1-1* knockout (middle panel), TPs accumulate in the cytosol  
 1040 due to the lack of starch biosynthesis. High TP/3-PGA levels in the cytosol promote  
 1041 anthocyanin production and sucrose biosynthesis. High sucrose levels enhance  $P_i$ -starvation  
 1042 responses (Lei et al., 2011), while TP turnover confined to the cytosol keeps PHR1 activation  
 1043 at a moderate level. In *adg1 tpt-2* (right hand side panel), TP export relies on the xylulose  
 1044 5-phosphate/ $P_i$  translocator (XPT) (Hilgers et al., 2018), keeping sucrose biosynthesis at low  
 1045 levels (Schmitz et al., 2012). TPs are partially consumed by glycolysis and imported back into  
 1046 the chloroplast by the phosphoenolpyruvate (PEP)/ $P_i$  translocator (PPT). Another portion of  
 1047 TPs and PEP is transferred to the vacuole where  $P_i$  is released by phosphatase activity.  
 1048 However, overall release of free  $P_i$  in the cytosol is low thus keeping PHR1 activity at high  
 1049 levels.
